1 Predicting Future Depressive Episodes from Resting-State  
2 fMRI with Generative Embedding

3

4 Herman Galiouline<sup>1\*</sup>, Stefan Frässle<sup>1</sup>, Sam Harrison<sup>1</sup>, Inês Pereira<sup>1</sup>, Jakob Heinzle<sup>1‡</sup>, Klaas Enno  
5 Stephan<sup>1,2‡</sup>

6

7 <sup>1</sup> Translational Neuromodeling Unit (TNU), Institute for Biomedical Engineering, University of Zurich  
8 & ETH Zurich, 8032 Zurich, Switzerland.

9 <sup>2</sup> Max Planck Institute for Metabolism Research, Cologne, Germany.

10

11

12

13 Keywords: depression, prediction, early detection, generative embedding, UK Biobank, translational  
14 neuromodeling, computational psychiatry

15

16 Running title: Predicting Depressive Episodes with Generative Embedding

17

18

19

20

21

22

23

24

25 \* Corresponding author: [galiouline@biomed.ee.ethz.ch](mailto:galiouline@biomed.ee.ethz.ch)

26 ‡ shared last authorship

27

28

## 29 Abstract

30 After a first episode of major depressive disorder (MDD), there is substantial risk for a long-term  
31 remitting-relapsing course. Prevention and early interventions are thus critically important. Various  
32 studies have examined the feasibility of detecting at-risk individuals based on out-of-sample  
33 predictions about the future occurrence of depression. However, functional magnetic resonance  
34 imaging (fMRI) has received very little attention for this purpose so far.

35 Here, we explored the utility of generative models (i.e. different dynamic causal models, DCMs) as  
36 well as functional connectivity (FC) for predicting future episodes of depression in never-depressed  
37 adults, using a large dataset (N=906) of task-free ("resting state") fMRI data from the UK Biobank.  
38 Connectivity analyses were conducted using timeseries from pre-computed spatially independent  
39 components of different dimensionalities. Over a three year period, 50% of participants showed  
40 indications of at least one depressive episode, while the other 50% did not. Using nested cross-  
41 validation for training and a held-out test set (80/20 split), we systematically examined the  
42 combination of 8 connectivity feature sets and 17 classifiers. We found that a generative embedding  
43 procedure based on combining regression DCM (rDCM) with a support vector machine (SVM)  
44 enabled the best predictions, both on the training set (0.63 accuracy, 0.66 area under the curve,  
45 AUC) and the test set (0.62 accuracy, 0.64 AUC;  $p < 0.001$ ). However, on the test set, rDCM was only  
46 slightly superior to predictions based on FC (0.59 accuracy, 0.61 AUC). Interpreting model  
47 predictions based on SHAP (SHapley Additive exPlanations) values suggested that the most  
48 predictive connections were widely distributed and not confined to specific networks. Overall, our  
49 analyses suggest (i) ways of improving future fMRI-based generative embedding approaches for the  
50 early detection of individuals at-risk for depression and that (ii) achieving accuracies of clinical utility  
51 may require combination of fMRI with other data modalities.

52

53

## 54 Introduction

55 Major depressive disorder (MDD) causes tremendous personal suffering and, amongst all medical  
56 conditions, has one of the highest burden of disease globally (GBD 2019 Mental Disorders  
57 Collaborators, 2022; Vos et al., 2020). It has a profoundly negative impact on social and occupational  
58 functions (Adler et al., 2006; Kupferberg et al., 2016) and is associated with increased risk for other  
59 mental and somatic (e.g. cardiovascular) disorders . After the onset of a first episode of MDD, there  
60 is a substantial risk for a long-term remitting-relapsing course (Eaton et al., 2008), accompanied by  
61 prolonged trial-and-error treatment attempts (Correll et al., 2017; Steffen et al., 2020). Prevention  
62 and early interventions are thus crucial for reducing the burden of MDD, both at an individual and  
63 societal level (Cuijpers et al., 2012, 2021). The challenge is to detect at-risk individuals early so that  
64 preventive measures and interventions can be administered in a timely and targeted fashion.

65 Detecting at-risk individuals requires prediction models that enable out-of-sample predictions about  
66 the future occurrence of (symptoms of) depression with clinically adequate accuracy. In the recent  
67 past, there have been numerous attempts to establish such models both in adolescents and adults,  
68 based on combinations of various data types, e.g. demographic, socioeconomic, cognitive, and  
69 clinical variables as well as motor activity (Caldirola et al., 2022; Chikersal et al., 2021; Gu et al.,  
70 2020; King et al., 2008; Librenza-Garcia et al., 2021; Lin et al., 2022; Na et al., 2020; Rocha et al.,  
71 2021; Rosellini et al., 2020; Sampson et al., 2021; van Eeden et al., 2021; Voorhees et al., 2008; Xu et  
72 al., 2019).

73 Neuroimaging has played a minor role in this endeavour so far. This may be partly due to difficulties  
74 of obtaining datasets that are longitudinal in nature and sufficiently large to allow for robust out-of-  
75 sample predictions. Several longitudinal magnetic resonance imaging (MRI) studies of depressive  
76 symptoms do exist (e.g. Barch et al., 2019; Pagliaccio et al., 2014; Pappmeyer et al., 2016; Shapero et  
77 al., 2019), but almost all have small to moderate sample sizes and employ within-sample association  
78 analyses. However, association is not prediction: prediction requires out-of-sample analyses, i.e. "...  
79 testing of the model on data separate from those used to estimate the model's parameters"  
80 (Poldrack et al., 2020). A recent exception is the study by Toenders et al. (2021) which predicted  
81 depression onset out-of-sample, based on structural MRI (and other) data from a large sample of  
82 544 adolescents. Concerning functional MRI (fMRI), however, we are aware of only one previous  
83 fMRI study (Hirshfeld-Becker et al., 2019) that has attempted out-of-sample predictions of future  
84 depressive episodes in hitherto depression-free individuals, albeit with a small sample (total N=33).  
85 The predictive value of fMRI for identifying individuals at risk for future depression is thus not well  
86 known.

87 One might wonder why fMRI should be considered at all for establishing predictor models of  
88 depressive episodes, given that fMRI data are more difficult to obtain and more costly than many  
89 other types of measurements? There are several reasons why fMRI – and particularly generative  
90 models for estimating connectivity – may have particular utility for clinical predictions. First, fMRI  
91 may afford high sensitivity since it assesses the functional status quo of neural circuits (Stephan et  
92 al., 2015), the biological level that is closest to psychiatric symptoms (Gordon, 2016). Second, clinical  
93 predictions are most valuable if they afford a mechanistic interpretation (Stephan et al., 2017); for  
94 example, this may guide the development of novel treatments. Analyses of functional interactions  
95 based on fMRI can potentially give insights into circuit mechanisms that increase risk for depression.  
96 Ideally, this requires generative models which offer an explanation how activity distributed  
97 throughout a circuit could have been generated (Stephan et al., 2015) and provide estimates of  
98 effective (directed) connectivity.

99 An approach that blends generative modeling with prediction is "generative embedding" (GE)  
100 (Brodersen et al., 2011, 2014; Frässle et al., 2020; Stephan et al., 2017). GE uses parameter  
101 estimates of a system (circuit) of interest, obtained by inverting a generative model, as features for  
102 subsequent machine learning (ML). This often improves prediction accuracy since the parameter  
103 estimates of a generative model offer a low-dimensional, de-noised representation of neural  
104 dynamics. Furthermore, provided the generative model is biologically plausible, GE may reveal which  
105 biological processes or properties (e.g. specific connections in a neural circuit) are most relevant for  
106 successful clinical predictions.

107 In this study, we used a large dataset (N=906) of task-free ("resting state") fMRI data from the UK  
108 Biobank (Miller et al., 2016) to explore the utility of fMRI-based connectivity measures for predicting  
109 future episodes of depression in never-depressed adults. Over a three year follow-up period, half of  
110 the selected participants (N=453) exhibited at least one indicator of depression, according to clinical  
111 records and/or self-report, while the other half remained free from depression. Both groups were  
112 carefully matched with regard to 7 potentially confounding variables (age, sex, handedness, tobacco,  
113 alcohol, illicit drugs, cannabis).

114 We emphasise that the goal of this work was not to test whether predictions based on fMRI data are  
115 better or worse than predictions based on other data types, e.g. socioeconomic or clinical variables.  
116 Instead, because there are numerous options of utilising fMRI for predictive analyses, this initial  
117 study focused on fMRI only and assessed the relative performance of different connectivity  
118 approaches – including generative embedding based on different variants of dynamic causal  
119 modeling (DCM)<sup>13</sup> as well as functional connectivity (FC) – for predicting future depressive episodes.  
120 Concretely, in our training set (N=724), we systematically combined different connectivity

121 approaches with different ML classifiers, using nested cross-validation, and tested how well they  
122 predicted the occurrence of at least one indicator of a depressive episode over a follow-up period of  
123 three years. We then used the best-performing combination to make the same prediction in a held-  
124 out test set (N=182) that was completely independent from the training data. Notably, predicting  
125 the occurrence of indicators of depressive episodes represents a more challenging scenario than  
126 predicting a full clinical diagnosis of MDD. Our study can thus be seen as a "stress test" whether  
127 fMRI-based assessments of connectivity, and generative models in particular, are likely to be useful  
128 at all for early detection of at-risk individuals.

## 129 Materials and Methods

130 The following sections describe the dataset and methodology used in this study. Briefly, the data  
131 consist of task-free fMRI measurements (i.e. unconstrained cognition or "resting state") and  
132 questionnaire data from the UK Biobank ([www.ukbiobank.ac.uk](http://www.ukbiobank.ac.uk)). Based on entries in UK Biobank,  
133 we selected participants that had good quality fMRI recordings and consistent questionnaire  
134 information that allowed us to assign them to one of two groups: a group that initially had no signs  
135 of depressive symptoms but exhibited indicators of depressive episodes (e.g. questionnaire data,  
136 prescription of antidepressants) within three years after the fMRI session (D+ group), or a control  
137 group that did not show any such indicators during the same period (D- group).

138 We used different connectivity metrics (different variants of DCM as well as functional connectivity,  
139 FC) in combination with different ML classifiers for prediction of future indicators of depressive  
140 episodes. DCM and FC analyses were applied to time series of rs-fMRI networks (with 6, 21, or 55  
141 nodes) defined by independent components analysis (ICA) of the preprocessed "resting-state" fMRI  
142 (rs-fMRI) data and provided by UK Biobank. Posterior parameter estimates (DCM) and Pearson  
143 correlation coefficients (FC), respectively, served as input features to various discriminative  
144 classifiers. The classifiers were trained using nested cross-validation to avoid overfitting and to  
145 provide the best possible estimate of generalizability. Finally, the best models were chosen, and a  
146 prediction was made on held-out (and completely independent) test data.

147 It is worth noting that our analysis was pre-specified in an ex ante analysis plan, prior to performing  
148 any of the analyses. The analysis plan was time-stamped by uploading it to the Git repository of the  
149 Translational Neuromodeling Unit (TNU); it is available at [https://gitlab.ethz.ch/tnu/analysis-](https://gitlab.ethz.ch/tnu/analysis-plans/galioulineetal_ukbb_pred_depr)  
150 [plans/galioulineetal\\_ukbb\\_pred\\_depr](https://gitlab.ethz.ch/tnu/analysis-plans/galioulineetal_ukbb_pred_depr). Furthermore, code reviews were performed by three of the  
151 co-authors (SF, SH and JH) who were not involved in the data analysis, both before the beginning of  
152 the analysis of the training data, and once again before running models on the test data. The code  
153 can be found at [https://gitlab.ethz.ch/tnu/code/galioulineetal\\_ukbb\\_pred\\_depr](https://gitlab.ethz.ch/tnu/code/galioulineetal_ukbb_pred_depr).

154

### 155 Dataset: groups with/without depressive episodes

156 The process of data extraction from the UK Biobank is summarised by Figure 1. To avoid confusion, it  
157 is worth explaining that participants of the neuroimaging branch of UK Biobank (which started in  
158 2014) underwent two fMRI scans, approx. three years apart, each of which involved both task fMRI  
159 and rs-fMRI data. In this study, we only used the rs-fMRI data acquired during the first scan.

160 Overall, selected individuals were required to have rs-fMRI data of good quality (as indicated by UK  
161 Biobank quality control) and no indication of any previous or current depressive episodes at the time

162 of their first fMRI scan. From the subset of participants that fulfilled these criteria, we aimed to  
163 select two groups, one of which continued to indicate no signs of depressive episodes (D- group)  
164 three years after their first scan, and one that showed at least one indicator for at least one  
165 depressive episode over this three-year period (D+ group).

166 Concretely, we first identified participants who had both task (UKB field 20249-2.0) and "resting-  
167 state" (UKB field 20227-2.0) fMRI scans in NIFTI format, ensuring quality controlled images already  
168 preprocessed by UK Biobank (Alfaro-Almagro et al., 2018), resulting in 35,485 participants. In order  
169 to define the D- group, we chose the subset of participants who responded "no" to the  
170 questionnaire item "Looking back over your life, have you ever had a time when you were feeling  
171 depressed or down for at least a whole week?" (UKB field 4598-2.0) when they were first scanned  
172 (2014+). This resulted in 15,739 participants. We further shrunk this set by selecting those  
173 individuals who continued to show no evidence of depression in following years (2014 to 2019) and  
174 again replied, at the second fMRI session in 2019+, "no" to the previous question (UKB field 4598-  
175 3.0). This resulted in 1,085 potential D- participants who could be searched for matching criteria  
176 once the D+ group had been determined.

177 Concerning the D+ group, we also selected individuals from the set of 15 739 participants who had  
178 preprocessed imaging data and who – during their first imaging questionnaire (2014+) – indicated  
179 never having been depressed. Since the UK Biobank does not include information about the absence  
180 or presence of a clinical diagnosis of depression for all participants, we used multiple sources of  
181 information to identify indicators of depression. Specifically, we searched selected UK Biobank data  
182 fields which plausibly indicated the occurrence of at least one depressive episode in the years after  
183 the first fMRI scan. The following list summarizes the data fields in UKB and number of hits.

- 184 • Medical records in UKB:
- 185 ○ First Clinically Recorded Depressive Episode [UKB 130894] (5 hits)
  - 186 ○ Clinical Depression-Related Encounter [UKB 41270] (31 hits)
  - 187 ○ Prescription of Antidepressants [UKB 20003] (6 hits)
  - 188 ○ Depression Diagnosis Report in UKB Assessment [UKB 20002] (12 hits)
- 189 • Self-report data in UKB:
- 190 ○ Depressed for at Least a Week Report [UKB 4598-2.0] (203 hits)
  - 191 ○ Depression Diagnosis Report in Mental Health Questionnaire [UKB 20544] (90 hits)
  - 192 ○ High Score (Coleman et al., 2020) on CIDI in Mental Health Questionnaire [UKB  
193 20446] (165 hits)
  - 194 ○ High Score (sum > 4) on Patient Health Questionnaire 3-subset [UKB 2050, 2060,  
195 2080] (6 hits)

196 Overall, this resulted in 518 potential D+ participants. Since for any given participant a previous  
197 depressive episode could be reflected by multiple hits, we took the union of the above 8 sets of hits.  
198 This resulted in a total of 464 participants in the D+ group.  
199 Having completed the initial definition of D+ and D- groups, we searched for data entries showing  
200 inconsistent or logically incompatible responses from participants (e.g. participants stating “never  
201 depressed for at least a week” but with a clinical report of depression). This process led to the  
202 removal of 9 participants in total, resulting in 455 participants in the D+ group and 1,076 participants  
203 in the D- group.

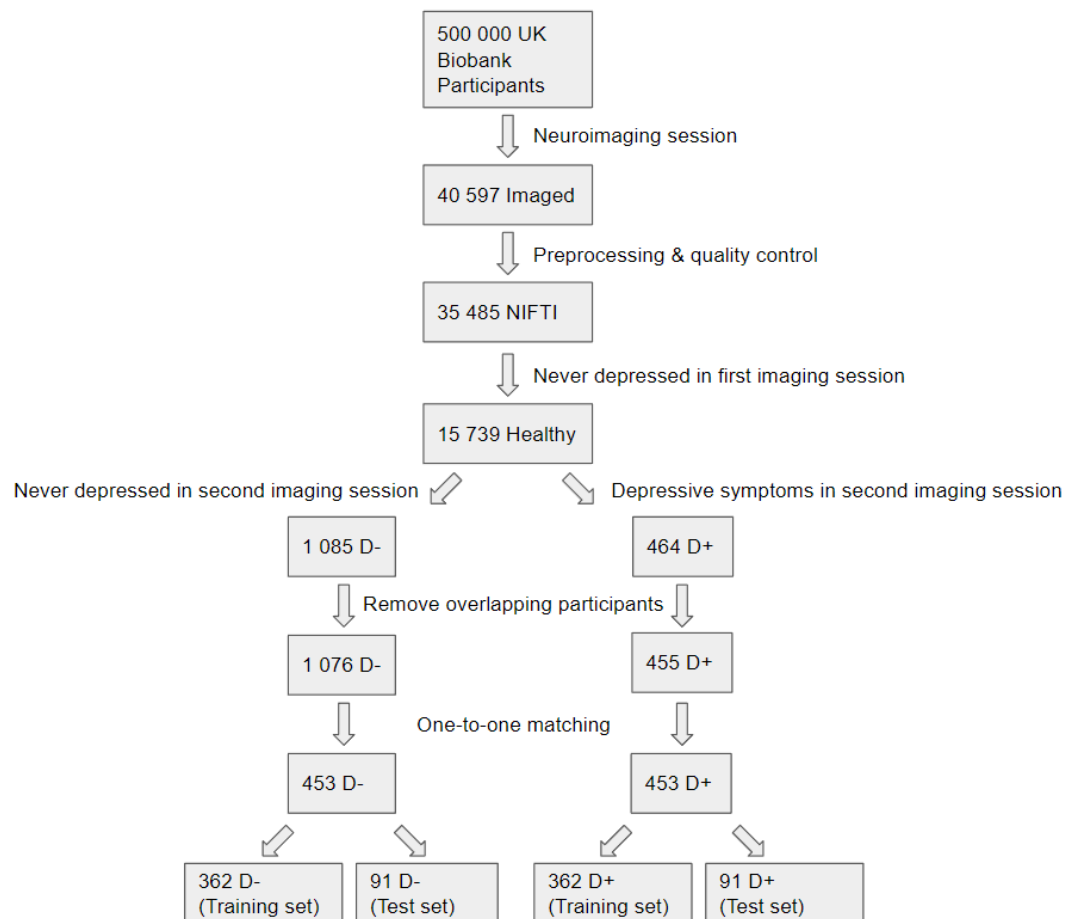

204

205 *Figure 1: Flow diagram representing the dataset selection process. D- represents subjects who indicated no signs of*  
206 *depression, whereas D+ represents subjects who showed at least one indicator of depression.*

## 207 Matching of participants and definition of training/test sets

208 To minimize any effects of potentially confounding variables, we matched participants with respect  
209 to multiple criteria. Specifically, for each D+ participant we tried to find a matching D- participant  
210 according to the following seven criteria (where a tolerance range was only allowed for age, as  
211 indicated):



- 212 • Sex (UKB field 31)
- 213 • Age  $\pm$  5 years (UKB field 34)
- 214 • Handedness (UKB field 1707)
- 215 • Tobacco smoking frequency (UKB field 1249)
- 216 • Alcohol consumption frequency (UKB field 1558)
- 217 • Ongoing addiction or dependence on illicit or recreational drugs (UKB field 20457)
- 218 • Historical cannabis consumption (UKB field 20453)

219 All but 57 D+ participants could be matched exactly. Out of these, 55 could be matched almost  
220 exactly, with at most one criterion deviating. Two D+ participants could not be matched and were  
221 excluded from further analyses. This provided us with a dataset of 906 participants in total: 453 D+  
222 participants and 453 matched D- participants.

223 Finally, we performed an 80/20 split to partition the data into training and test sets. Both datasets  
224 were strictly separated from each other during data analysis to prevent any leakage of information  
225 that could affect the prediction results. We also addressed an unlikely, but theoretically possible,  
226 information leakage stemming from UK Biobank itself: the templates of major functional networks in  
227 the brain (Miller et al., 2016) which are offered by UK Biobank and which our study used for data  
228 extraction had been created using rs-fMRI data from the first 4,181 individuals in UKB. We resolved  
229 this potential problem by ensuring that all participants from this set that were also part of our  
230 extracted data were assigned to the training set. This resulted in patient/control training sets with  
231 362 individuals each and test sets with 91 individuals (Figure 1).

## 232 **FMRI Data Analysis**

233 Wherever possible we used data that is directly available on UK Biobank and did not require  
234 additional processing. The rs-fMRI data are of 6 minute duration (490 images, TR=0.735s), with a  
235 spatial resolution of 2.4mm isotropic, and were acquired with 8x multislice acceleration (Alfaro-  
236 Almagro et al., 2018). We used the data after the standard preprocessing pipeline executed by UK  
237 Biobank. The processing steps performed at UK Biobank included realignment, EPI distortion  
238 correction, and high-pass temporal filtering (with a 50s cut-off). The rs-fMRI data were further  
239 processed using single-subject spatial ICA decomposition using MELODIC in FSL (Jenkinson et al.,  
240 2012). The resulting independent components (ICs) were classified as signal vs. noise, and a cleaned  
241 version of the data was provided. UK Biobank then fed these data into a dual regression (Nickerson  
242 et al., 2017) based on a set of group-level templates of "resting-state" networks (based on data from  
243 4'181 subjects) at dimensionalities of either 25 or 100. For subsequent analyses, 21/25 and 55/100

244 ICs were kept, as the others were found in previous work to be “...clearly identifiable as artefactual  
245 (i.e., not neuronally driven)” (Alfaro-Almagro et al., 2018).

246 ICs of resting-state data can be thought of as distinct functional networks (Smith et al., 2009), and  
247 interactions between these networks can be investigated by applying functional and effective  
248 connectivity methods to IC timeseries (for previous examples, see Goulden et al., 2014; Hyett et al.,  
249 2015; Motlaghian et al., 2022). In this work, we selected three sets of networks, which differed in  
250 the number of ICs included. Since we were interested in major functional networks implicated in  
251 depression (Brakowski et al., 2017; Kaiser et al., 2015), our first IC selection targeted the default  
252 mode network (DMN), central executive network (CEN), salience network (SN), and the dorsal  
253 attention network (DAN). The DMN and DAN are mapped (Miller et al., 2016) to IC indices 1 and 3,  
254 respectively, while the left/right SN and left/right CEN are mapped (Gratton et al., 2018; Shen et al.,  
255 2018) to IC indices 6, 5 and 13, 21, respectively. Furthermore, we considered IC sets of size 21 and 55  
256 components (as provided by UK Biobank) in order to explore the impact of increasing the number of  
257 networks/ICs on prediction performance. The 55 components can be interrogated interactively via a  
258 web-based visualisation tool provided by UK Biobank:

259 [https://www.fmrib.ox.ac.uk/ukbiobank/group\\_means/rfMRI\\_ICA\\_d100\\_good\\_nodes.html](https://www.fmrib.ox.ac.uk/ukbiobank/group_means/rfMRI_ICA_d100_good_nodes.html)

260

## 261 Generative Embedding

262 Having completed the selection of timeseries, our analysis proceeded to generative embedding (GE).  
263 GE requires two choices: (i) a generative model, and (ii) a ML method that uses posterior estimates  
264 from the generative model as features.

265 Concerning the choice of generative models, our analysis considered three different variants of DCM  
266 that are suitable for task-free fMRI data: stochastic DCM (Li et al., 2011), spectral DCM (Friston et al.,  
267 2014), and regression DCM (Frässle, Harrison, et al., 2021). For all models and all IC sets, we  
268 assumed a fully connected network. As a reference, we also obtained functional connectivity  
269 estimates, based on Pearson correlation coefficients.

270 To invert stochastic DCMs, we used the *spm\_dcm\_estimate* function in SPM12, with a DCM struct as  
271 input which had its *Y.y* set to the 6 timeseries, *a* set to a 6x6 matrix of ones (fully connected network  
272 of endogenous connections), and *Y.dt* set to 0.735 (interscan interval). This resulted in a 6x6 matrix  
273 of effective connectivity estimates, giving us 36 features for subsequent ML. Due to its high  
274 computational complexity, it was not possible to run stochastic DCM with 21 and 55 IC timeseries.

275 For spectral DCM, we used the SPM12 function *spm\_dcm\_fmri\_csd* with the same exact DCM struct  
276 as for stochastic DCM as input. The performance was notably faster than for stochastic DCM, but  
277 given that it still took a few hours to run on the Euler high-performance computing cluster of ETH  
278 Zurich and that the scaling of the computational complexity is supra-linear in the number of ICs (i.e.,  
279 number of nodes in the DCM), we estimated that it would still take weeks or even months to run the  
280 entire analysis (i.e., inversion of the DCMs for all subjects) for 21 or 55 IC timeseries. Hence, just like  
281 in the stochastic DCM case, we restricted the spectral DCM analysis to 6 IC timeseries.

282 Concerning rDCM, its high computational efficiency enabled us to analyse networks consisting of  
283 more components (6, 21, and 55 ICs), resulting in 36, 441, and 3025 features, respectively. We used  
284 the rDCM code in TAPAS 4.0 (Frässle, Aponte, et al., 2021), with *Y.y* set to the respective time series,  
285 and *Y.dt* set to 0.735.

286 Finally, FC matrices were computed using the *corrcoef* function in MATLAB. Since these matrices are  
287 symmetric along the diagonal, and the diagonal is always 1, we took the upper triangle of these  
288 matrices to be our features, resulting in 15, 210, and 1485 features for the respective IC sets. It is  
289 important to note that FC does not capture any information about the directionality of connections,  
290 as opposed to the effective connectivity measures from the DCM variants described above.

291

## 292 Classification

293 From the previous generative modeling, we had eight feature sets in place – functional connectivity  
294 for each IC set (6, 21, 55), stochastic and spectral DCM for 6 ICs each, and three rDCM feature sets  
295 for 6, 21 and 55 ICs. These feature sets were subsequently used as input to discriminative classifiers.  
296 Initially, we restricted all analyses to the training set data, and only touched the test data once we  
297 had selected a feature set / classifier combination that performed best. Regardless of the specific  
298 classifier chosen, the steps taken to arrive at reported metrics are the same.

299 Classifier training was performed using nested cross-validation (CV). Nested CV provides robustness  
300 against overfitting by optimizing hyperparameters in an inner CV loop while averaging the  
301 performance against other partitions of the data in an outer CV loop (Cawley & Talbot, 2010; Stone,  
302 1974). In our case, we used 10 folds in the outer loop, and 5 folds in the inner loop. At the beginning  
303 of each iteration of the outer loop (before training with hyperparameter optimization), the  
304 confounds (sex, age, handedness, smoking, alcohol, illicit drugs, cannabis) were linearly regressed  
305 out using scikit-learn's *LinearRegression* module. Then the data were normalized using the  
306 *StandardScaler* module and then the classifier was finally fit with the *GridSearchCV* module. This

307 procedure yielded a set of performance measures for each feature/classifier combination (see  
308 Results).

309 After evaluation of the feature/classifier pairs on the training data, there are several possibilities  
310 how models fitted on the training data could be applied to the test data. First, we evaluated whether  
311 the feature set/classifier combination that had performed best on the training set generalised to the  
312 test set. Second, we performed a post hoc analysis in which we examined each feature set together  
313 with the classifier that had been optimal for this specific feature set on the training data.

314 In addition to evaluating classifiers based on their performance metrics, we also ran permutation  
315 tests to check for statistical significance of the classification results. These tests were run both on  
316 our training and test set. To generate an empirical null distribution for a given feature/classifier pair,  
317 we randomly permuted the labels while considering subject pairs between the D- and D+ groups,  
318 originating from the matching of confounds. This is done by identifying a pair and flipping their labels  
319 with 0.5 probability. For the resulting permuted labels, the classifier is trained again by re-running  
320 the entire nested CV procedure, yielding performance metrics under random conditions. This  
321 process is repeated many times ( $n = 1,000$  in our case) to construct the empirical null distribution of  
322 performance metrics. We then compute the rank of the true performance metrics (obtained from  
323 the prediction without shuffling the labels) by calculating how many instances of the null distribution  
324 performed better. Dividing the rank by the number of permutations yields the p-value which we  
325 report.

326 A separate question concerned the choice of hyperparameters for the test set. While there are  
327 multiple options how hyperparameters for prediction on the test set could be chosen, we decided to  
328 use all data from the training set for optimising hyperparameters: we ran a non-nested 5-fold CV on  
329 the entire training set, picked the best-performing hyperparameters, and used those to predict on  
330 the test set. Other aspects relevant for classification on the test set, such as permutation testing,  
331 and regression of confounds were identical to the training set. Please see Figure 2 for a summary of  
332 the Materials and Methods described above.

333 Finally, we ran an interpretability analysis on our best-performing feature set/classifier combination  
334 (rDCM estimates based on 55 ICs and an SVM with a sigmoid kernel). This analysis based on SHAP  
335 (SHapley Additive exPlanations) (Lundberg & Lee, 2017), a generalisation of Shapley values from  
336 game theory (Shapley, 1953). For each feature, SHAP assigns an importance or attribution value that  
337 describes how much that feature contributes to the overall prediction. We used the *shap* software  
338 (<https://github.com/slundberg/shap>) to create a *KernelExplainer* that took as arguments:

339 - a sigmoid SVM classifier trained on rDCM with 55 ICs,

340 - a low-dimensional representation of the training data using *shap.kmeans* with five clusters  
341 (for computational tractability; see *shap* documentation)

342 Then, we computed the SHAP values using the explainer's *shap\_values* function which takes the test  
343 data as an argument. This gives us a SHAP value for each feature for each subject, which we process  
344 (mean of SHAP value magnitude across subjects) to obtain the average impact of each feature on  
345 model output magnitude.

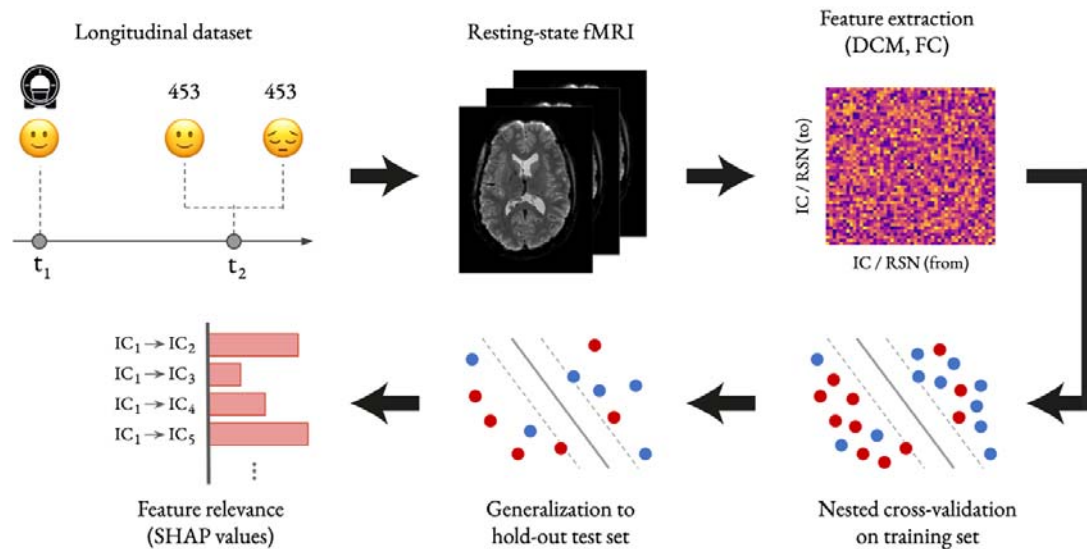

346

347 *Figure 2: Illustration of the generative embedding pipeline utilized in the present study for predicting indicators of future*  
348 *depressive episodes. The pipeline comprises: Definition of the longitudinal dataset (top, left), identification of data features*  
349 *from the resting-state fMRI (rs-fMRI) data (top, middle), feature extraction, representing effective connectivity (dynamic*  
350 *causal modeling, DCM) or functional connectivity (FC) estimates amongst independent components (IC) or resting state*  
351 *networks (RSN) derived from the rs-fMRI data (top, right), nested cross-validation on the training set (bottom, right),*  
352 *generalization to the test set (bottom, middle), and feature relevance analysis based on SHAP values (bottom, left). Parts of*  
353 *the figure contain material from [shutterstock.com](https://www.shutterstock.com) (with permission).*

## 354 Choice and Implementation of Classifiers

355 A total of 17 classifiers were evaluated (please see Table 1 in the Results section), including six  
356 support vector machine (SVM) variants and three neural network (NN) variants. As described in the  
357 following, for most classifiers, we chose hyperparameters to optimize within the inner nested CV  
358 loop. For two classifiers (Gaussian naive Bayes and quadratic discriminant analysis) where  
359 hyperparameter tuning is less common, we kept scikit-learn's default parameters.

360 A first classifier was *logistic regression*. Following the default parameters of the scikit-learn version,  
361 we also used  $L_2$  regularization, used *lbfgs* as our solver, and iterated at maximum 100 times. In the  
362 inner CV loop, we optimized for the regularization parameter C (0.01, 0.1, 1, 10, 100), which is the  
363 inverse of regularization strength (smaller values enforce stronger regularization).

364 For the *SVMs*, we made use of Platt scaling (Platt, 1999) to get probabilistic outputs for use in an  
365 AUROC (area under the receiver-operating characteristic curve) metric. We attempted classification  
366 with all types of kernels that scikit-learn has to offer, which include linear, radial basis function (RBF),  
367 sigmoid, and polynomial kernels with order 3, 4, and 5. We again treated the regularization  
368 parameter  $C$  (0.01, 0.1, 1) as a hyperparameter and additionally tuned gamma (1, 0.1, 0.01, 0.001) —  
369 the kernel coefficient for the RBF, sigmoid, and polynomial kernels.

370 We included three *neural network* variants (1, 2, and 3 hidden layers) which treat their layer sizes as  
371 hyperparameters. All other parameters are scikit-learn defaults (version 0.23.2), which means that —  
372 unlike logistic regression — the activation function used is actually ReLU (Rectified Linear Unit; Nair &  
373 Hinton, 2010).

#### 374 Neural Network Hyperparameters

- 375 • 1 hidden layer sizes: 100, 150, 300, 500
- 376 • 2 hidden layers sizes: (100, 50), (150, 20), (300, 100), (500, 250)
- 377 • 3 hidden layers sizes: (100, 50, 5), (150, 20, 10), (500, 250, 50)

378 Ensemble methods combine multiple base models to (hopefully) produce better results than each  
379 individual model would have on its own. One such algorithm we used is *AdaBoost* (Freund &  
380 Schapire, 1997). We employed the scikit-learn default base classifier (decision tree) treating the  
381 number of estimators (30, 50, 70) as a hyperparameter. For a baseline comparison, we also  
382 attempted classification with a *single decision tree* with default scikit-learn parameters. Another  
383 ensemble method used in our classification is *gradient boosting* (Friedman, 2001) with 50, 100, 150  
384 estimators as hyperparameters. Finally, we also tried *random forest* (Breiman, 2001), with options to  
385 tune 100, 500, 1000 estimators. For random forest, we additionally treated the maximum tree depth  
386 (10, 30, 60) as a hyperparameter.

387 We also explored prediction with three supervised learning algorithms that do not fall under the  
388 previous categories. Namely, *Gaussian naive Bayes* (Zhang, 2004), *quadratic discriminant analysis*  
389 (Cover, 1965) — both of which use scikit-learn default parameters — and *k-nearest neighbors* (Cover &  
390 Hart, 1967) where we treated the number of neighbors (3, 5, 7, 9) and leaf size (20, 30, 40) as  
391 hyperparameters.

392 We used a variety of metrics to evaluate classifier performance in order to ensure a holistic view and  
393 to avoid potential pitfalls (such as overemphasizing the importance of one metric). We report recall  
394 (sensitivity), precision (positive predictive value),  $F_1$  score, accuracy, and AUROC (area under the  
395 receiver-operating characteristic curve).

396

## 397 **Deviations from the original analysis plan**

398 Our analyses were pre-specified and are described in a time-stamped analysis plan

399 ([https://gitlab.ethz.ch/tnu/analysis-plans/galioullineetal\\_ukbb\\_pred\\_depr](https://gitlab.ethz.ch/tnu/analysis-plans/galioullineetal_ukbb_pred_depr)). We subsequently

400 extended this analysis plan in three ways:

- 401 1. We extended the coverage of networks and, in addition to the 6 networks (represented by  
402 IC timeseries), also considered sets of networks consisting of 21 and 55 ICs, as provided by  
403 UK Biobank.
- 404 2. We extended the connectivity methods by considering functional connectivity (Pearson  
405 correlation coefficients) in addition to variants of DCM as generative models.
- 406 3. In addition to SVMs, we decided to test a larger set of classifiers in order to avoid that our  
407 results may depend on the particular choice of classifier.
- 408 4. We included an analysis of feature importance on the test set using SHAP values.

409 The decision to extend the analyses in this manner took place before any prediction analyses of the  
410 training or test data were conducted.

411

412

## 413 Results

414 We first present the performance of the cross-validated classifiers for the training dataset and then  
 415 proceed with the most promising feature/classifier combinations to the test dataset. Note: since our  
 416 dataset is balanced, accuracy as a metric implies balanced accuracy.

### 417 Training set

418 Table 1 provides an overview of prediction performance on the training set in the nested cross-  
 419 validation setting. Altogether, 17 different classifiers were evaluated (including four SVM variants  
 420 and three neural network variants). We report AUROC of all the features run with each classifier  
 421 (Table 1) and we also report all metrics for the five best feature/classifier combinations (Table 2).

|             |           | Features |         |         |         |         |          |           |           |
|-------------|-----------|----------|---------|---------|---------|---------|----------|-----------|-----------|
|             |           | FC (6)   | FC (21) | FC (55) | St. DCM | Sp. DCM | rDCM (6) | rDCM (21) | rDCM (55) |
| Classifiers | Ada       | 0.52     | 0.49    | 0.56    | 0.49    | 0.47    | 0.55     | 0.54      | 0.56      |
|             | DTC       | 0.49     | 0.49    | 0.52    | 0.50    | 0.51    | 0.51     | 0.53      | 0.52      |
|             | GBC       | 0.51     | 0.50    | 0.57    | 0.49    | 0.45    | 0.60*    | 0.60*     | 0.64*     |
|             | GNB       | 0.53     | 0.54    | 0.54    | 0.50    | 0.49    | 0.61*    | 0.61*     | 0.63*     |
|             | kNN       | 0.52     | 0.54    | 0.51    | 0.49    | 0.47    | 0.53     | 0.58      | 0.59      |
|             | LR        | 0.54     | 0.52    | 0.55    | 0.51    | 0.51    | 0.59     | 0.58      | 0.58      |
|             | NN (1)    | 0.47     | 0.52    | 0.55    | 0.47    | 0.55    | 0.50     | 0.60*     | 0.61*     |
|             | NN (2)    | 0.47     | 0.52    | 0.54    | 0.48    | 0.53    | 0.50     | 0.58      | 0.63*     |
|             | NN (3)    | 0.48     | 0.52    | 0.55    | 0.50    | 0.54    | 0.53     | 0.59      | 0.62*     |
|             | QDA       | 0.47     | 0.52    | 0.50    | 0.52    | 0.53    | 0.52     | 0.48      | 0.51      |
|             | RF        | 0.51     | 0.52    | 0.56    | 0.49    | 0.47    | 0.57     | 0.63*     | 0.66*     |
|             | SVM (lin) | 0.54     | 0.50    | 0.55    | 0.51    | 0.48    | 0.58     | 0.58      | 0.56      |
|             | SVM (3)   | 0.47     | 0.49    | 0.52    | 0.52    | 0.55    | 0.59     | 0.61*     | 0.65*     |
|             | SVM (4)   | 0.49     | 0.50    | 0.47    | 0.50    | 0.47    | 0.49     | 0.46      | 0.47      |
|             | SVM (5)   | 0.49     | 0.47    | 0.47    | 0.49    | 0.55    | 0.56     | 0.47      | 0.46      |
|             | SVM (rbf) | 0.51     | 0.51    | 0.55    | 0.50    | 0.50    | 0.60*    | 0.63*     | 0.65*     |
|             | SVM (sig) | 0.52     | 0.52    | 0.47    | 0.48    | 0.48    | 0.61*    | 0.64*     | 0.66*     |

422

423 Table 1: Summary table of AUROC for each feature/classifier combination as determined by nested cross-validation on the  
 424 training set. Bold represents the best result across classifiers for a given feature set, orange shading represents the best  
 425 result across feature sets for a given classifier, and a star denotes a statistically significant result ( $p \leq 0.05$ ). Ada: AdaBoost,  
 426 DTC: Decision Tree Classifier, GBC: Gradient Boosting Classifier, GNB: Gaussian Naive Bayes, kNN: k-Nearest Neighbors,  
 427 SVM (lin): Support Vector Machine with linear kernel, LR: Logistic Regression, NN (n): Neural Network with n layers, SVM  
 428 (n): Support Vector Machine with polynomial kernel order n, QDA: Quadratic Discriminant Analysis, SVM (rbf): Support  
 429 Vector Machine with radial basis function kernel, RF: Random Forest, SVM (sig): Support Vector Machine with sigmoid  
 430 kernel.



| Features + Model     | Precision   | Recall      | $F_1$ Score | Accuracy    | AUC         |
|----------------------|-------------|-------------|-------------|-------------|-------------|
| rDCM(55) + SVM (sig) | <b>0.64</b> | <b>0.60</b> | <b>0.62</b> | <b>0.63</b> | <b>0.66</b> |
| rDCM(55) + RF        | 0.63        | 0.58        | 0.60        | 0.62        | <b>0.66</b> |
| rDCM(55) + SVM (3)   | 0.63        | 0.59        | 0.61        | 0.62        | 0.65        |
| rDCM(55) + SVM (rbf) | <b>0.64</b> | 0.58        | 0.61        | 0.62        | 0.65        |
| rDCM(22) + SVM (sig) | 0.62        | 0.57        | 0.59        | 0.61        | 0.64        |

431

432 *Table 2: Summary of all metrics on the top five feature set/classifier combination as determined by nested cross-validation*  
 433 *on the training set. Bold indicates the best model for the given metric.*

434 Having run all feature set/classifier pairs on the training data using nested cross-validation, we found  
 435 that a sigmoid SVM paired with an rDCM taking 55 ICs – referred to subsequently as rDCM(55) – as  
 436 input performed best (Tables 1, 2). In terms of performance, applying a sigmoid SVM to rDCM  
 437 connectivity estimates based on 55 ICs resulted in an AUROC of 0.66 (Figure 3A). The other  
 438 performance metrics for this combination were: precision=0.64, recall=0.60, F1 score=0.62,  
 439 accuracy=0.63 (Table 2).

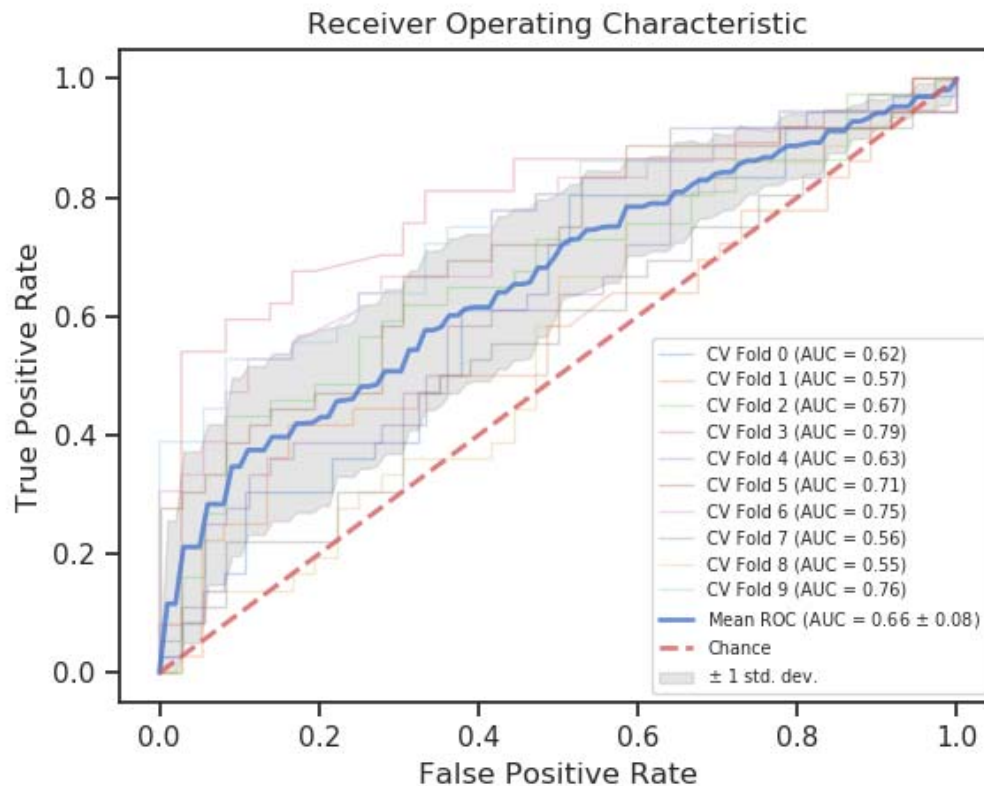

440

441 *Figure 3: ROC curve for sigmoid SVM paired with rDCM(55) on the training set run with nested cross validation.*

442 In general, connectivity estimates by rDCM enabled better predictions, regardless of classifier (see  
 443 Table 1, orange shading); for 15 out of the 17 classifiers tested, one of the rDCM feature sets

444 resulted in the best AUROC (in 11/15 cases, the best feature set was rDCM(55)). Furthermore, SVMs  
445 tended to perform better than other classifiers, with SVM variants having highest accuracy for 6 out  
446 of 8 connectivity feature sets. In particular, the sigmoid SVM was the best-performing classifier for 3  
447 feature sets, more than any other classifier.

448 Based on these results, we chose rDCM(55) with sigmoid SVM to move forward to the test set. The  
449 test data had not been touched up until this point to prevent any leakage of information and ensure  
450 a thorough verification of the generalizability of our prediction model.

451

## 452 Test set

453 The prediction of the best-performing approach on the training set generalized to the test data: the  
454 application of a sigmoid SVM to connectivity estimates by rDCM (55 ICs) from the test set showed an  
455 AUROC of 0.64 (Figure 4A). This prediction performance was significantly above chance: Figure 4B  
456 shows that the achieved accuracy of 62% is well outside the null distribution generated by  
457 predictions on randomly permuted labels ( $p < 0.001$ ).

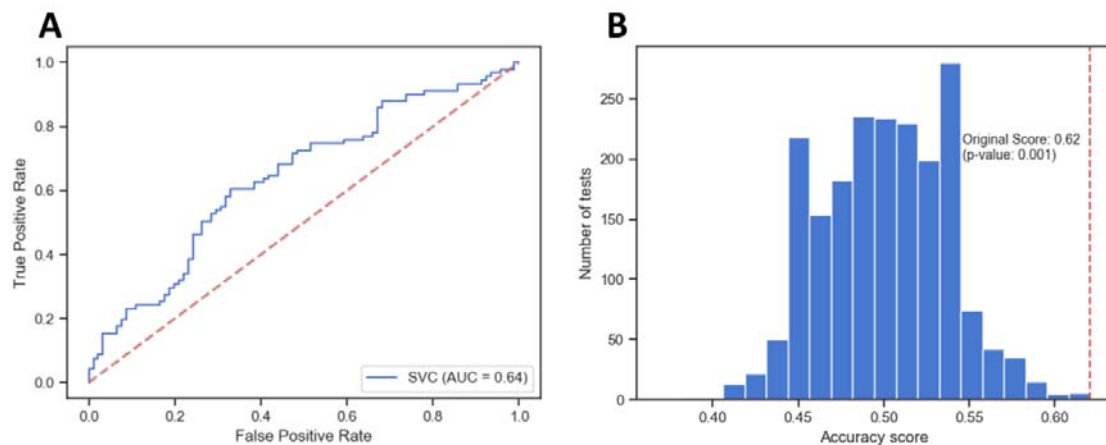

458

459 *Figure 4: (A) ROC curve of rDCM (55 ICs) with sigmoid SVM run on test data. (B) Permutation test (n=1,000) run on test data*  
460 *with accuracy as the metric.*

461 To get a better understanding of the generalization performance we conducted a post-hoc analysis  
462 on other well-performing feature/classifier pairs (Table 3) from the nested cross-validation and  
463 assessed their performance on the test data. We defined “well-performing” as the best classifier in  
464 general, but for feature sets where another classifier performed better, we selected the latter  
465 instead. From the 13 classifiers tested post-hoc, only three other pairs had above-chance  
466 performance on the test set, namely rDCM (21 ICs) with sigmoid SVM (58% accuracy,  $p=0.019$ ),  
467 functional connectivity (6 ICs) with sigmoid SVM (59% accuracy,  $p=0.007$ ), and functional

468 connectivity (21 ICs) with Gaussian Naïve Bayes (59% accuracy, p-value=0.012). All of these  
469 performed worse with at least a 3% drop in accuracy, leaving the rDCM (55 ICs) with sigmoid SVM as  
470 the best-performing model overall on the test data.

| Features + Model     | Precision   | Recall      | $F_1$ Score | Accuracy    | AUC         |
|----------------------|-------------|-------------|-------------|-------------|-------------|
| rDCM(55) + SVM (sig) | <b>0.63</b> | 0.56        | <b>0.60</b> | <b>0.62</b> | <b>0.64</b> |
| FC(21) + GNB         | 0.59        | <b>0.60</b> | 0.59        | 0.59        | 0.58        |
| FC(6) + SVM (sig)    | 0.59        | 0.59        | 0.59        | 0.59        | 0.61        |
| rDCM(21) + SVM (sig) | 0.60        | 0.51        | 0.55        | 0.58        | 0.59        |
| FC(6) + Log Res      | 0.57        | 0.52        | 0.54        | 0.57        | 0.61        |

471

472 *Table 3: Summary of all metrics on the top five feature/classifier combinations on the test set.*

473

474 Finally, we computed the SHAP values (Figure 5) for our best-performing model, the sigmoid SVM  
475 classifier paired with rDCM(55). This assesses the contribution of each connection to the prediction  
476 performance. Since rDCM provides estimates of effective (directed) connectivity, we have two SHAP  
477 value estimates for each IC, one for the outgoing connection, and one for the incoming connection.  
478 We visualized the top 100 SHAP values as a circular plot, where each IC is shown twice, and the  
479 bottom half represents the associated values for the outgoing connections. The width of each  
480 displayed connection reflects the magnitude of the SHAP value, and the width of the coloured IC  
481 label on the circle represents the cumulative SHAP value for outgoing or incoming connections of  
482 that node. Figure 5 shows that connections with the top 100 SHAP values were not confined to a few  
483 networks but included almost all ICs, with very few exceptions. Put simply, during the "resting" state  
484 of unconstrained cognition the participants were in, the most predictive connections were found all  
485 over the brain.

486 Furthermore, we examined the entire distribution of SHAP values, which is shown as a histogram in  
487 Figure 6. This demonstrates that all connections contribute to the model's prediction, albeit most of  
488 them to a small degree. The distribution shows considerable spread and a long tail, where the  
489 contribution of the most important connection (from IC 34 to IC 24; compare Figure 5) is two orders  
490 of magnitude larger than connections at the mode of the histogram.

It is made available under a [CC-BY 4.0 International license](https://creativecommons.org/licenses/by/4.0/) .

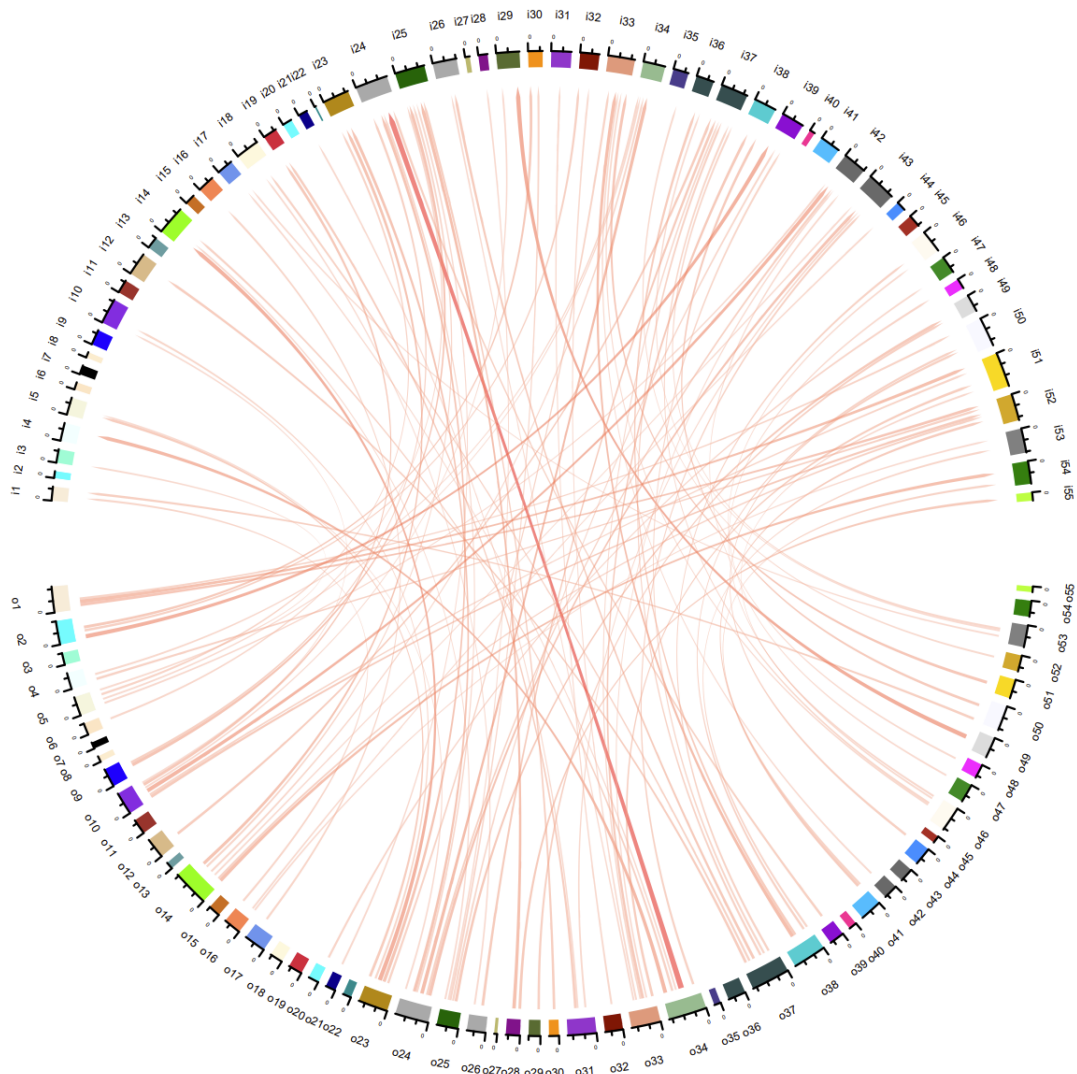

491

492 *Figure 5: Top 100 Shapley values for sigmoid SVM paired with rDCM(55) on the test data. Bottom half are outgoing*  
493 *connections from each of the 55 ICs, and top half are incoming connections.*

494

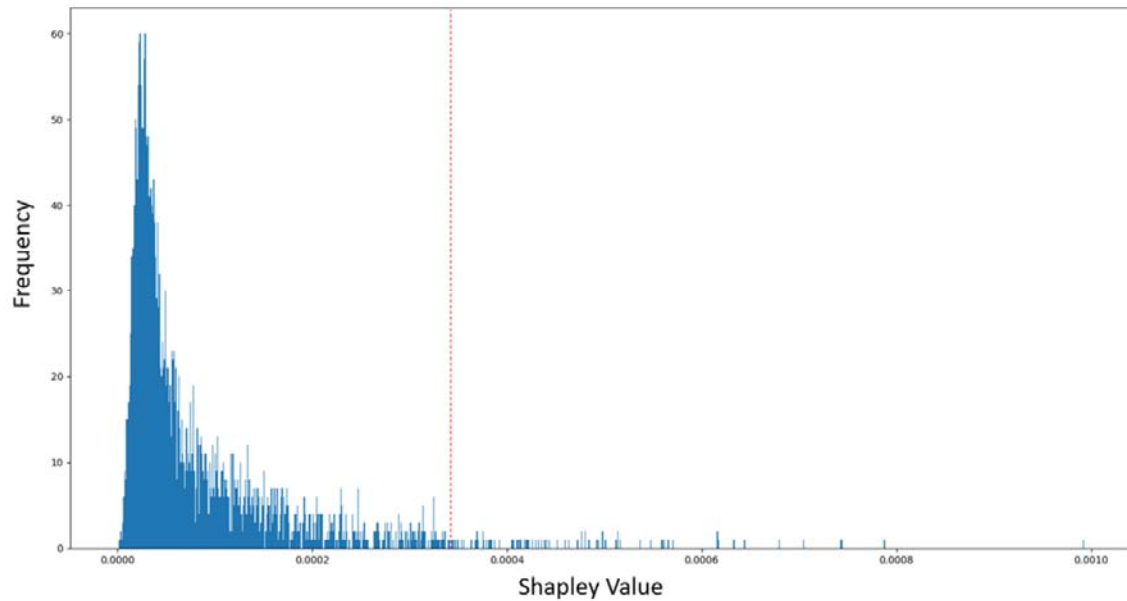

495

496 *Figure 6: Shapley value distribution for sigmoid SVM paired with rDCM(55) on the test data. Values to the right of the*  
497 *dashed red line are in the top 100.*

## 498 Discussion

499 MDD is a syndrome with heterogenous disease trajectories (Merikangas et al., 1994) and variable  
500 treatment responses (Rush et al., 2006). Given the importance for clinical management, predicting  
501 future clinical outcomes of individual MDD patients has become an important topic in computational  
502 psychiatry. In particular, various fMRI studies have examined the feasibility of predicting treatment  
503 response (e.g. Harris et al., 2022; Hopman et al., 2021; Ju et al., 2020; Osuch et al., 2018; Queirazza  
504 et al., 2019), relapse (e.g. Berwian et al., 2020; Lawrence et al., 2022), or disease trajectories (e.g.  
505 Frässle et al., 2020; Schmaal et al., 2015) in individuals with MDD.

506 By contrast, there have been hardly any attempts to use fMRI to address another challenge of  
507 similar importance: the early detection of individuals who are at risk of experiencing a future  
508 episode of depression. Given the high frequency of a prolonged remitting-relapsing disease course  
509 after a first episode of MDD (Eaton et al., 2008), identifying at-risk individuals is crucial for enabling  
510 the targeted deployment of preventive measures and early interventions. So far, to our knowledge,  
511 there has only been a single study that used fMRI for detecting individuals at-risk for future  
512 depression (Hirshfeld-Becker et al., 2019). This previous study used rs-fMRI and functional  
513 connectivity measures in a small sample of individuals with familial risk for MDD (N=33 for  
514 prediction).

515 The study presented in this paper is novel in several ways. It is the first study using generative  
516 models of fMRI data as a basis for predicting future depressive episodes, using three different

517 variants of DCM, in comparison to simpler functional connectivity measures. It uses a large balanced  
518 sample size (N=906), carefully matches groups with presence and absence of depressive symptoms,  
519 examines the combination of 8 connectivity feature sets with 17 classifiers in a training set, and  
520 evaluates the generalisability of the best predictions using a held-out test set.

521 The results from the training set (Table 1) indicated that the combination of the rDCM(55) feature  
522 set (i.e. rDCM-based connectivity estimates between 55 networks or ICs) and a SVM (with a sigmoid  
523 kernel) performed best, showing an AUROC of 0.66 and an accuracy of 63%. This result was  
524 significantly above chance, as indicated by permutation testing ( $p=0.001$ , Figure 3B). Moreover,  
525 across classifiers, rDCM demonstrated higher predictive value than other connectivity methods (see  
526 Table 1): for 15 out of the 17 classifiers tested, one of the rDCM feature sets resulted in the best  
527 AUROC; in 11/15 cases, the best feature set was rDCM(55). Examining the results along the other  
528 dimension of our investigation, i.e. across all connectivity feature sets, SVMs performed better than  
529 other classifiers: for 6 out of 8 connectivity feature sets, one of the SVM variants had the highest  
530 accuracy. In particular, a SVM with a sigmoid kernel performed best for 3 feature sets, surpassing  
531 any other classifier.

532 Evaluating the best combination (i.e. rDCM(55) + SVM with sigmoid kernel) on the test set confirmed  
533 the generalisability of the predictions, resulting in an AUROC of 0.64 and an accuracy of 62%. This  
534 was significantly above chance ( $p=0.001$ ), as confirmed by permutation testing (Figure 4B). In a post-  
535 hoc analysis, we also evaluated the predictive value of all other connectivity feature sets on the test  
536 set; notably, for each feature set, we used the classifier that had performed best on the training set.  
537 These analyses showed that three other combinations of connectivity features/classifiers (rDCM(21)  
538 + sigmoid SVM, FC(6) + sigmoid SVM, and FC(21) + Gaussian Naïve Bayes) also achieved significant  
539 results, although with slightly lower accuracy (58-59%).

540 In short, our results thus demonstrate that a GE procedure – based on applying rDCM to rs-fMRI  
541 timeseries from a large number of ICs (55) – enabled the best predictions about the occurrence of  
542 future depressive episodes within a 3-year period. Having said this, the superiority of GE over a  
543 simpler prediction procedure based on FC estimates was not large, amounting to 3% higher accuracy  
544 and 0.03 higher AUROC compared to the combination of FC(6) + sigmoid SVM. A binomial test  
545 indicated that this difference in accuracy was not significant ( $p=0.315$ ).

546 The lack of a decisive advantage of generative embedding in this rs-fMRI study contrasts with  
547 previous task-based fMRI studies in which GE based on DCM was clearly superior to predictions  
548 based on FC estimates (e.g. Brodersen et al., 2011, 2014; Frässle et al., 2018, 2020). For example,  
549 DCM estimates of effective connectivity during a face perception task allowed for substantially more

550 accurate predictions of MDD disease trajectories than FC estimates: balanced accuracies for  
551 predicting a chronic course vs. remission were 79% for DCM and 50% for FC, a difference that was  
552 highly significant (Frässle et al. 2020).

553 In order to understand the limited advantage of GE over FC-based prediction in this study, it is useful  
554 to first consider the general reasons why one would, in general, expect GE to show superior  
555 performance. In brief:

556 (i) GE exploits the fact that a generative model partitions data into signal and noise. Using  
557 model parameter estimates (as a low-dimensional representation of signal) as features  
558 for subsequent ML ensures that only meaningful information underpins training of  
559 classifiers. This makes it less likely that predictions are informed by noise and do not  
560 generalise. By contrast, measures of functional connectivity, such as correlation  
561 coefficients, reflect both signal and noise. As highlighted by Friston (2011), functional  
562 connectivity estimates based on correlations are highly susceptible to changes in the  
563 signal-to-noise ratio of data.

564 (ii) A generative model like DCM distinguishes different mechanisms how measured signal  
565 in a system of interest is caused, e.g. connections between system nodes or external  
566 inputs. This allows predictions to be differentially informed by distinct system  
567 mechanisms. By contrast, FC cannot distinguish whether co-varying signal in two brain  
568 regions is caused by shared input or by connections between the regions.

569 (iii) DCM provides directed connectivity estimates, allowing one to obtain separate weights  
570 for reciprocal connections between regions. By contrast, FC can only provide undirected  
571 estimates of connection strengths.

572 (iv) From a classical test theory perspective, test-retest reliability of connection strength  
573 estimates would be considered an important prerequisite for predictive validity.  
574 Concerning rs-FC, test-retest reliability has been examined in numerous studies; a recent  
575 meta-analysis reported that, on average, individual connection estimates have limited  
576 test-retest reliability (Noble et al., 2019). A direct comparison between FC and rDCM-  
577 based estimates of connectivity on identical data (rs-fMRI and multiple tasks)  
578 demonstrated that rDCM performed more favourably in this regard (see Figure 3 in  
579 Frässle & Stephan, 2022).

580 Considering these general factors, one possibility why we only found a limited advantage of GE over  
581 FC-based predictions in this study relates to (i) above: in the present study, connectivity was  
582 estimated from timeseries that resulted from ICA decomposition and subsequent (manual) removal  
583 of components that were identified as noise (Alfaro-Almagro et al., 2018). This approach may have

584 diminished the difference between GE and FC-based prediction with regard to denoising. For  
585 comparison, in previous comparisons of GE and FC-based predictions (e.g. Brodersen et al., 2011,  
586 2014; Frässle et al., 2018, 2020), timeseries were obtained by computing the first principal  
587 component from regional BOLD measurements, which does not involve a specific distinction  
588 between signal and noise. Another possible explanation derives from (ii): application of rDCM to rs-  
589 fMRI data essentially means that the model "switches off" external inputs (Frässle, Harrison, et al.,  
590 2021). This reduces the superiority in representational richness of GE.

591 In summary, this suggests that, in the current setting of IC-based rs-fMRI timeseries, only factors (iii)  
592 and (iv) – but not factors (i) and (ii) – could potentially contribute to higher performance of GE. In  
593 order to obtain an impression of the potential impact of factor (iii) – the ability of DCM to obtain  
594 separate weights for reciprocal connections between network nodes – we visually explored the  
595 asymmetries of node-level SHAP values for incoming versus outgoing connections. For each of the  
596 55 network nodes (ICs), Fig. 7 plots SHAP values summed across all incoming (afferent) and outgoing  
597 (efferent) connections, respectively. Visually, it is apparent that for many of the network nodes, the  
598 explanatory contributions of incoming versus outgoing connections differ considerably (up to 59%).  
599 A more fine-grained plot of connection-specific SHAP values is provided by Fig. 8.

600 These plots also illustrate a disadvantage of the analysis approach we have chosen in the current  
601 study. Specifically, using ICs as network nodes diminish the advantage GE usually enjoys in terms of  
602 rendering predictions neurophysiologically interpretable. For example, as shown by Figures 5 and 8,  
603 the connection with the largest SHAP value is the connection from IC 34 to IC 24. Both of these  
604 components include a set of fronto-parietal areas: IC 34 includes bilateral frontal regions that appear  
605 to match the location of the frontal eye fields as well as more anterior parts of the superior parietal  
606 cortex. By contrast, IC 24 contains more posterior bilateral parietal areas, including large parts of  
607 bilateral intraparietal sulcus, as well as parts of right middle frontal gyrus and right middle/inferior  
608 temporal gyrus. Given this complex anatomical configuration, the biological interpretation of a  
609 (directed) functional coupling between IC 34 and IC 24 is not as straightforward as a functional  
610 coupling between specific frontal and/or parietal areas. While the FC between these components  
611 does not enable any easier interpretations, this example illustrates that the usual interpretive  
612 advantage of GE tends to be lost when using IC components as nodes of networks.

613

614



It is made available under a [CC-BY 4.0 International license](https://creativecommons.org/licenses/by/4.0/).

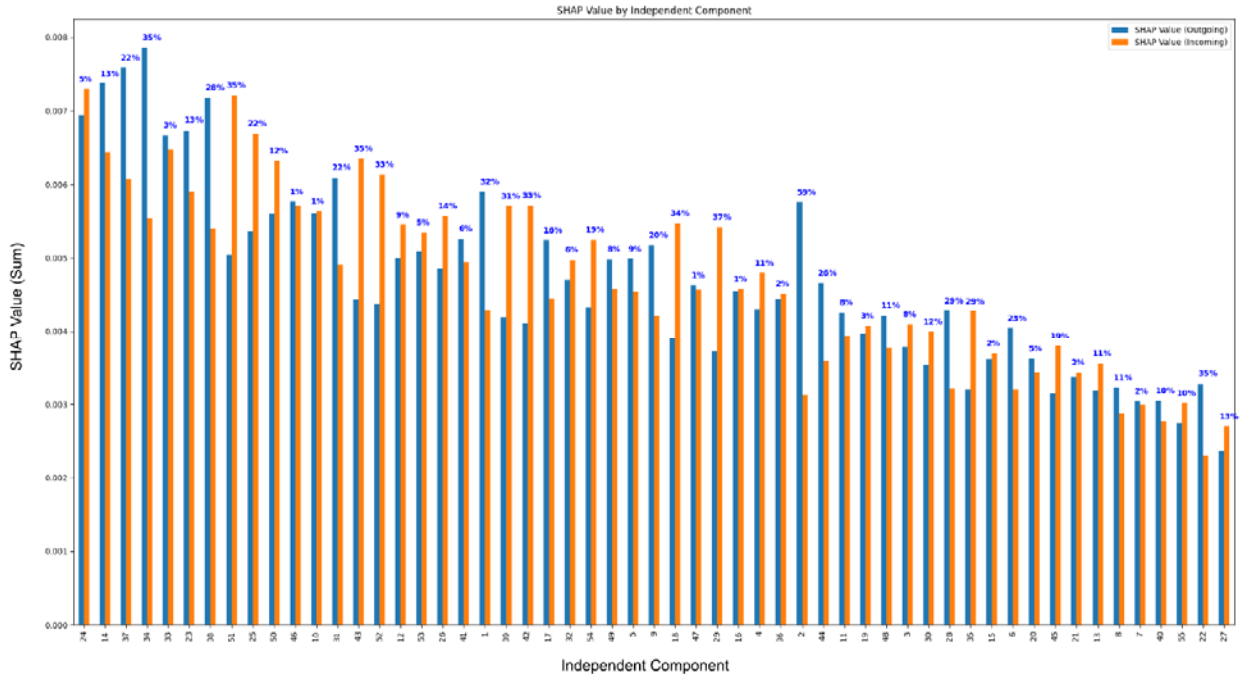

615

616 *Figure 7: SHAP values summed across the incoming (afferent) and outgoing (efferent) connections of each IC. Percentages*  
617 *indicate the % difference in SHAP values for afferent and efferent connections. The plot concerns predictions based on*  
618 *rDCM(55) estimates and SVM with a sigmoid kernel.*

619

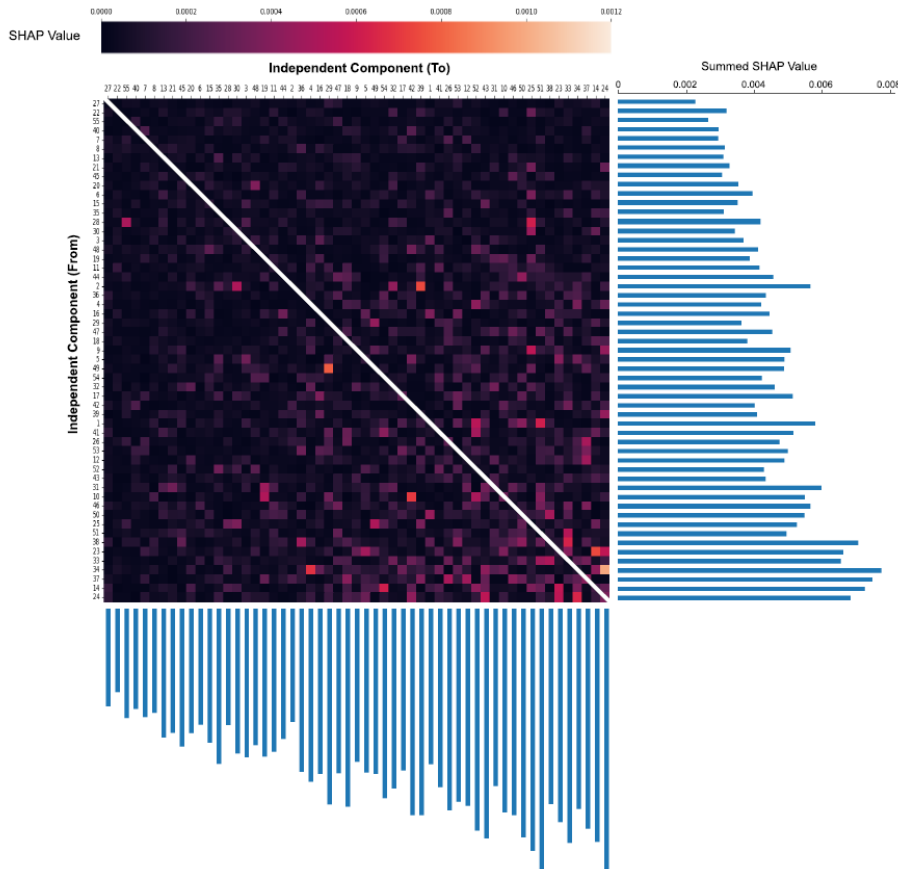

620

621 *Figure 8: Matrix of connections between all ICs, showing the connections' colour-coded SHAP values (test data) for*  
622 *predictions based on rDCM(55) estimates and sigmoid SVM. ICs are ordered according to summed SHAP values.*

623

624 Three further aspects of the results deserve discussion. First, it may initially seem surprising that  
625 SVM turned out to be the most successful classifier in our comparison, surpassing potentially more  
626 powerful methods like neural networks. However, this result is compatible with several recent  
627 reports that, for neuroimaging data, kernel-based methods like SVMs (and, in some cases, even  
628 simpler linear models) perform equivalently to neural networks for sample sizes up to 10,000 (Cole  
629 et al., 2017; He et al., 2020; Schulz et al., 2020).

630 Second, in our post-hoc analysis of connectivity features/classifier combinations on the test set,  
631 three of four significant predictions used the same classifier, an SVM with a sigmoid kernel.  
632 Strikingly, FC achieved a significant 59% predictive accuracy using only 6 ICs, whereas the more  
633 accurate prediction by rDCM (62%) used 55 ICs, respectively. The resulting difference in the number  
634 of features is substantial (15 for FC versus 3025 for rDCM), and it is not immediately clear why  
635 predictions based on functional vs. effective connectivity differed greatly in the preferred  
636 dimensionality of the feature set. One speculative explanation – which would be consistent with the  
637 findings in Figures 7 and 8 – is that differences in the strengths of reciprocal between-network  
638 connections provide subtle but meaningful information that is distributed over many connections  
639 (compare factor (iii) above). This type of information would only be reflected by rDCM, but not by  
640 FC-based, connectivity estimates. More generally, it is not clear why FC(6) performed so well on the  
641 test data at all. The nested CV on the training data did not indicate that this feature set might be  
642 particularly predictive (maximum accuracy of FC-based predictions with any classifier was 54%, none  
643 of them significant). The finding of a higher accuracy (59%) on the test set our post-hoc analysis was  
644 surprising. It might be a chance result due to the variance inherent in CV procedures (Varoquaux,  
645 2018) but otherwise lacks a compelling explanation.

646 Third, contrary to our expectations, predictions based on stochastic and spectral DCM did not  
647 generalise to the test set. One possible reason for the lack of successful generalisation is that the  
648 higher complexity of the model formulation (e.g. the flexible hemodynamic component and the  
649 more sophisticated noise model) could make parameter estimation less reliable, e.g. due to greater  
650 abundance of local extrema in the objective function, which would be expected to harm  
651 generalisability. This possibility is supported by a recent investigation of parameter recovery of  
652 spectral DCM and rDCM which found more accurate parameter recovery for the latter (Frässle et al.  
653 2021). Perhaps even more importantly, however, we could only run spectral and stochastic DCM for  
654 6 ICs on our cluster; for larger feature sets, their compute time (within the context of our entire

655 analysis pipeline) became prohibitively long. However, considering the success of rDCM based on 55  
656 ICs, it is plausible that spectral and stochastic DCM may have performed better if we had been able  
657 to run them with larger IC sets (21 and 55).

658 How does the prediction performance achieved in this study compare to previous results in the  
659 literature? The only previous fMRI study on predicting future depression (Hirshfeld-Becker et al.,  
660 2019) used FC estimates based on rs-fMRI data from six regions, achieving 92% accuracy. However,  
661 this study recruited never-depressed children with familial risk for MDD, as opposed to never-  
662 depressed participants from the general population as in our study. Additionally, given the more  
663 specific focus of the previous study, only 33 participants were available for classification (25 at-risk  
664 children, eight controls); this small sample size did not allow for verification in a held-out dataset.  
665 Another useful (although not fMRI-based) comparison study utilized structural MRI together with  
666 clinical data, questionnaires, and environmental variables (Toenders et al. 2021). The study used a  
667 large training set (N=407 adolescents) and an independent test set (N=137), achieving an AUROC  
668 between 0.68-0.72.

669 It is also instructive to consider the results from non-imaging studies that used demographic,  
670 socioeconomic, and clinical variables for predicting the future onset of depression. When  
671 considering those studies that had large sample sizes (i.e. N>500) and tested for generalisability in an  
672 independent test set, the reported AUROC values in the literature range between 0.71-0.87  
673 (Caldirola et al., 2022; King et al., 2008; Librenza-Garcia et al., 2021; Na et al., 2020; Xu et al., 2019).  
674 It is noteworthy, however, that these studies mostly used imbalanced datasets where the number of  
675 negative cases (no future depressive episode) far outnumber the positive cases. For example, in the  
676 two studies with the highest prediction performance – i.e., AUROC of 0.87 (Na et al., 2020) and 0.85  
677 (Caldirola et al., 2022) – individuals with future depressive episodes amounted to approx. only 8%  
678 and 7% of the respective samples. Even when techniques such as oversampling are used (as in Na et  
679 al., 2020; but not always the case in other studies), such imbalance can lead to overly optimistic  
680 estimates of prediction performance.

681 Our study has strengths and limitations. Its strengths include an ex ante analysis plan  
682 ([https://gitlab.ethz.ch/tnu/analysis-plans/galioulineetal\\_ukbb\\_pred\\_depr](https://gitlab.ethz.ch/tnu/analysis-plans/galioulineetal_ukbb_pred_depr)) and a large (N>900) and  
683 balanced sample in which groups were carefully matched for 7 potentially confounding variables  
684 (age, sex, handedness, tobacco smoking frequency, alcohol consumption frequency, ongoing  
685 addictions to illicit drugs, and historical cannabis consumption). This degree of matching is unusually  
686 comprehensive (for comparison, in clinical trials and observational studies, it is rarely possible to  
687 match for more than two variables) and only made possible by the large resource of the UK Biobank.

688 Furthermore, we conducted a comprehensive comparison of 8 different connectivity measures and  
689 17 classifiers, ensuring that training and test data were strictly separated throughout all analyses.

690 Concerning weaknesses, our study has a retrospective design which allows for less robust  
691 conclusions than from a prospective study. Furthermore, one potential weakness of the variants of  
692 DCM used in this study is that they all rely on variational Bayesian techniques, rendering model  
693 inversion susceptible to local extrema in the objective function (Daunizeau et al., 2011). In theory,  
694 this could have been addressed by a multi-start procedure, as in previous work with DCM (Schöbi et  
695 al., 2021; van Wijk et al., 2018). In practice, however, we were unable to implement this approach  
696 given that it would have led to an explosion of the already very substantial compute time. Finally,  
697 the greatest limitation of our study is the definition of depressive episodes. Given the heterogeneity  
698 of clinical data in the UK Biobank and the lack of systematic information about absence/presence of  
699 a clinical diagnosis of depression, we combined multiple sources of information within UK Biobank –  
700 i.e., clinical records, questionnaires (PHQ, MHQ) and self-report specifically on issues of depression –  
701 to identify indicators of at least one depressive episode within three years after the fMRI scan.  
702 Clearly, this partial reliance on self-report is not ideal; additionally, the resulting group of  
703 participants with a putative depressive episode (D+ group) is likely heterogeneous and might include  
704 people with very different severities of depression. Furthermore, there is rarely information on  
705 when exactly within the 3-year period a depressive episode occurred; the likely interindividual  
706 variability in the latency of symptom onset after the fMRI scan would further add to the  
707 heterogeneity of the D+ group. Having said this, our approach is similar to previous analyses of  
708 depression in the UK Biobank that also relied on self-report and questionnaires like the MHQ  
709 (Howard et al., 2020). More generally, a pragmatic approach to identifying individuals with likely  
710 clinical characteristics is often unavoidable when working with large heterogeneous databases (for  
711 an example using self-reported depression in genetics, see Wray et al., 2018). The challenge how to  
712 optimally extract data from the UK Biobank for studies of MDD is being addressed by ongoing  
713 methodological developments (Dutt et al., 2022) which will help to improve and standardise future  
714 studies.

715 Overall, our results have four implications. First, given the challenging nature of the prediction  
716 problem tackled in the study (i.e. occurrence of indicators of depressive episodes, as opposed to full  
717 clinical diagnoses, over a three year period), it is encouraging that significant predictions on held-out  
718 data can be obtained at all. Second, despite this success and the potential for further optimisation,  
719 our study suggests that fMRI on its own may not be sufficient for clinically useful predictions. Future  
720 studies of predicting depression should utilise fMRI-based connectivity estimates in conjunction with  
721 additional data (e.g. demographic, socioeconomic, clinical). Third, while GE results based on rDCM

722 were consistently successful across all classifiers and enjoyed a numerical advantage over FC for  
723 clinical predictions, performance differences were modest and nonsignificant. The magnitude of  
724 performance differences between GE and FC in this study and previous work suggests that adding  
725 task-based fMRI may enhance the difference in predictive accuracy. Finally, using IC components as  
726 network nodes diminishes the usual advantage of GE with regard to biological interpretability of  
727 predictions. In order to maintain the interpretability of GE based predictions, it would seem  
728 advantageous to compute effective connectivity between disjoint areas from parcellations based on  
729 combined anatomical-functional criteria (e.g. Fan et al., 2016; Glasser et al., 2016). We hope that  
730 these conclusions will be useful for future work on predicting the occurrence of depressive episodes.  
731

732 **Author contributions according to CRediT (Contributor Roles**  
733 **Taxonomy)**

734 **Herman Galiouline:** Investigation, Software, Formal analysis, Writing – Original Draft, Visualization

735 **Stefan Frässle:** Investigation, Supervision, Validation, Software, Methodology, Writing – Review &  
736 Editing

737 **Samuel Harrison:** Investigation, Supervision, Validation, Software, Methodology, Writing – Review &  
738 Editing

739 **Inês Pereira:** Investigation, Validation, Writing – Review & Editing

740 **Jakob Heinzle:** Investigation, Supervision, Validation, Software, Methodology, Writing – Review &  
741 Editing

742 **Klaas Enno Stephan:** Investigation, Conceptualization, Supervision, Methodology, Project  
743 administration, Funding acquisition, Writing – Review & Editing

744

745 **Acknowledgements**

746 This work was supported by the René and Susanne Braginsky Foundation (KES), the ETH Foundation  
747 (KES), and project grant 320030\_179377 by the Swiss National Science Foundation (KES).

748

749

## 750 References

- 751 Adler, D. A., McLaughlin, T. J., Rogers, W. H., Chang, H., Lapitsky, L., & Lerner, D. (2006). Job  
752 Performance Deficits Due to Depression. *American Journal of Psychiatry*, *163*(9), 1569–1576.  
753 <https://doi.org/10.1176/ajp.2006.163.9.1569>
- 754 Alfaro-Almagro, F., Jenkinson, M., Bangerter, N. K., Andersson, J. L. R., Griffanti, L., Douaud, G.,  
755 Sotiropoulos, S. N., Jbabdi, S., Hernandez-Fernandez, M., Vallee, E., Vidaurre, D., Webster, M.,  
756 McCarthy, P., Rorden, C., Daducci, A., Alexander, D. C., Zhang, H., Dragonu, I., Matthews, P. M., ...  
757 Smith, S. M. (2018). Image processing and Quality Control for the first 10,000 brain imaging datasets  
758 from UK Biobank. *Neuroimage*, *166*, 400–424. <https://doi.org/10.1016/j.neuroimage.2017.10.034>
- 759 Barch, D. M., Harms, M. P., Tillman, R., Hawkey, E., & Luby, J. L. (2019). Early Childhood Depression,  
760 Emotion Regulation, Episodic Memory and Hippocampal Development. *Journal of Abnormal*  
761 *Psychology*, *128*(1), 81–95. <https://doi.org/10.1037/abn0000392>
- 762 Berwian, I. M., Wenzel, J. G., Kuehn, L., Schnuerer, I., Kasper, L., Veer, I. M., Seifritz, E., Stephan, K. E.,  
763 Walter, H., & Huys, Q. J. M. (2020). The relationship between resting-state functional connectivity,  
764 antidepressant discontinuation and depression relapse. *Scientific Reports*, *10*(1), Article 1.  
765 <https://doi.org/10.1038/s41598-020-79170-9>
- 766 Brakowski, J., Spinelli, S., Dörig, N., Bosch, O. G., Manoliu, A., Holtforth, M. G., & Seifritz, E. (2017).  
767 Resting state brain network function in major depression—Depression symptomatology,  
768 antidepressant treatment effects, future research. *Journal of Psychiatric Research*, *92*, 147–159.  
769 <https://doi.org/10.1016/j.jpsychires.2017.04.007>
- 770 Breiman, L. (2001). Random Forests. *Machine Learning*, *45*(1), 5–32.  
771 <https://doi.org/10.1023/A:1010933404324>
- 772 Brodersen, K. H., Deserno, L., Schlagenhaut, F., Lin, Z., Penny, W. D., Buhmann, J. M., & Stephan, K. E.  
773 (2014). Dissecting psychiatric spectrum disorders by generative embedding. *NeuroImage: Clinical*, *4*,  
774 98–111. <https://doi.org/10.1016/j.nicl.2013.11.002>
- 775 Brodersen, K. H., Schofield, T. M., Leff, A. P., Ong, C. S., Lomakina, E. I., Buhmann, J. M., & Stephan,  
776 K. E. (2011). Generative Embedding for Model-Based Classification of fMRI Data. *PLOS*  
777 *Computational Biology*, *7*(6), e1002079. <https://doi.org/10.1371/journal.pcbi.1002079>
- 778 Caldirola, D., Daccò, S., Cuniberti, F., Grassi, M., Alciati, A., Torti, T., & Perna, G. (2022). First-onset  
779 major depression during the COVID-19 pandemic: A predictive machine learning model. *Journal of*  
780 *Affective Disorders*, *310*, 75–86. <https://doi.org/10.1016/j.jad.2022.04.145>
- 781 Cawley, G. C., & Talbot, N. L. C. (2010). On Over-fitting in Model Selection and Subsequent Selection  
782 Bias in Performance Evaluation. *Journal of Machine Learning Research*, *11*(70), 2079–2107.
- 783 Chikersal, P., Doryab, A., Tumminia, M., Villalba, D. K., Dutcher, J. M., Liu, X., Cohen, S., Creswell, K.  
784 G., Mankoff, J., Creswell, J. D., Goel, M., & Dey, A. K. (2021). Detecting Depression and Predicting its  
785 Onset Using Longitudinal Symptoms Captured by Passive Sensing: A Machine Learning Approach  
786 With Robust Feature Selection. *ACM Transactions on Computer-Human Interaction*, *28*(1), 3:1-3:41.  
787 <https://doi.org/10.1145/3422821>
- 788 Cole, J. H., Poudel, R. P. K., Tsagkrasoulis, D., Caan, M. W. A., Steves, C., Spector, T. D., & Montana, G.  
789 (2017). Predicting brain age with deep learning from raw imaging data results in a reliable and  
790 heritable biomarker. *NeuroImage*, *163*, 115–124. <https://doi.org/10.1016/j.neuroimage.2017.07.059>

- 791 Coleman, J. R. I., Peyrot, W. J., Purves, K. L., Davis, K. A. S., Rayner, C., Choi, S. W., Hübel, C., Gaspar,  
792 H. A., Kan, C., Van der Auwera, S., Adams, M. J., Lyall, D. M., Choi, K. W., Dunn, E. C., Vassos, E.,  
793 Danese, A., Maughan, B., Grabe, H. J., Lewis, C. M., ... Breen, G. (2020). Genome-wide gene-  
794 environment analyses of major depressive disorder and reported lifetime traumatic experiences in  
795 UK Biobank. *Molecular Psychiatry*, 25(7), Article 7. <https://doi.org/10.1038/s41380-019-0546-6>
- 796 Correll, C. U., Solmi, M., Veronese, N., Bortolato, B., Rosson, S., Santonastaso, P., Thapa-Chhetri, N.,  
797 Fornaro, M., Gallicchio, D., Collantoni, E., Pigato, G., Favaro, A., Monaco, F., Kohler, C., Vancampfort,  
798 D., Ward, P. B., Gaughran, F., Carvalho, A. F., & Stubbs, B. (2017). Prevalence, incidence and  
799 mortality from cardiovascular disease in patients with pooled and specific severe mental illness: A  
800 large-scale meta-analysis of 3,211,768 patients and 113,383,368 controls. *World Psychiatry*, 16(2),  
801 163–180. <https://doi.org/10.1002/wps.20420>
- 802 Cover. (1965). Geometrical and Statistical Properties of Systems of Linear Inequalities with  
803 Applications in Pattern Recognition. *IEEE Transactions on Electronic Computers*, EC-14(3), 326–334.  
804 <https://doi.org/10.1109/PGEC.1965.264137>
- 805 Cover, & Hart, P. (1967). Nearest neighbor pattern classification. *IEEE Transactions on Information*  
806 *Theory*, 13(1), 21–27. <https://doi.org/10.1109/TIT.1967.1053964>
- 807 Cuijpers, P., Beekman, A. T. F., & Reynolds, C. F. (2012). Preventing Depression: A Global Priority.  
808 *JAMA*, 307(10), 1033–1034. <https://doi.org/10.1001/jama.2012.271>
- 809 Cuijpers, P., Pineda, B. S., Quero, S., Karyotaki, E., Struijs, S. Y., Figueroa, C. A., Llamas, J. A.,  
810 Furukawa, T. A., & Muñoz, R. F. (2021). Psychological interventions to prevent the onset of  
811 depressive disorders: A meta-analysis of randomized controlled trials. *Clinical Psychology Review*, 83,  
812 101955. <https://doi.org/10.1016/j.cpr.2020.101955>
- 813 Daunizeau, J., David, O., & Stephan, K. E. (2011). Dynamic causal modelling: A critical review of the  
814 biophysical and statistical foundations. *NeuroImage*, 58(2), 312–322.  
815 <https://doi.org/10.1016/j.neuroimage.2009.11.062>
- 816 Dutt, R. K., Hannon, K., Easley, T. O., Griffis, J. C., Zhang, W., & Bijsterbosch, J. D. (2022). Mental  
817 health in the UK Biobank: A roadmap to self-report measures and neuroimaging correlates. *Human*  
818 *Brain Mapping*, 43(2), 816–832. <https://doi.org/10.1002/hbm.25690>
- 819 Eaton, W. W., Shao, H., Nestadt, G., Lee, B. H., Bienvenu, O. J., & Zandi, P. (2008). Population-Based  
820 Study of First Onset and Chronicity in Major Depressive Disorder. *Archives of General Psychiatry*,  
821 65(5), 513–520. <https://doi.org/10.1001/archpsyc.65.5.513>
- 822 Fan, L., Li, H., Zhuo, J., Zhang, Y., Wang, J., Chen, L., Yang, Z., Chu, C., Xie, S., Laird, A. R., Fox, P. T.,  
823 Eickhoff, S. B., Yu, C., & Jiang, T. (2016). The Human Brainnetome Atlas: A New Brain Atlas Based on  
824 Connectional Architecture. *Cerebral Cortex*, 26(8), 3508–3526.  
825 <https://doi.org/10.1093/cercor/bhw157>
- 826 Frässle, S., Aponte, E. A., Bollmann, S., Brodersen, K. H., Do, C. T., Harrison, O. K., Harrison, S. J.,  
827 Heinzle, J., Iglesias, S., Kasper, L., Lomakina, E. I., Mathys, C., Müller-Schrader, M., Pereira, I.,  
828 Petzschner, F. H., Raman, S., Schöbi, D., Toussaint, B., Weber, L. A., ... Stephan, K. E. (2021). TAPAS:  
829 An Open-Source Software Package for Translational Neuromodeling and Computational Psychiatry.  
830 *Frontiers in Psychiatry*, 12, 680811. <https://doi.org/10.3389/fpsy.2021.680811>
- 831 Frässle, S., Harrison, S. J., Heinzle, J., Clementz, B. A., Tamminga, C. A., Sweeney, J. A., Gershon, E. S.,  
832 Keshavan, M. S., Pearlson, G. D., Powers, A., & Stephan, K. E. (2021). Regression dynamic causal



- 833 modeling for resting-state fMRI. *Human Brain Mapping*, 42(7), 2159–2180.  
834 <https://doi.org/10.1002/hbm.25357>
- 835 Frässle, S., Marquand, A. F., Schmaal, L., Dinga, R., Veltman, D. J., van der Wee, N. J. A., van Tol, M.-  
836 J., Schöbi, D., Penninx, B. W. J. H., & Stephan, K. E. (2020). Predicting individual clinical trajectories of  
837 depression with generative embedding. *NeuroImage: Clinical*, 26, 102213.  
838 <https://doi.org/10.1016/j.nicl.2020.102213>
- 839 Frässle, S., & Stephan, K. E. (2022). Test-retest reliability of regression dynamic causal modeling.  
840 *Network Neuroscience*, 6(1), 135–160. [https://doi.org/10.1162/netn\\_a\\_00215](https://doi.org/10.1162/netn_a_00215)
- 841 Frässle, S., Yao, Y., Schöbi, D., Aponte, E. A., Heinzle, J., & Stephan, K. E. (2018). Generative models  
842 for clinical applications in computational psychiatry. *WIREs Cognitive Science*, 9(3), e1460.  
843 <https://doi.org/10.1002/wcs.1460>
- 844 Freund, Y., & Schapire, R. E. (1997). A Decision-Theoretic Generalization of On-Line Learning and an  
845 Application to Boosting. *Journal of Computer and System Sciences*, 55(1), 119–139.  
846 <https://doi.org/10.1006/jcss.1997.1504>
- 847 Friedman, J. H. (2001). Greedy function approximation: A gradient boosting machine. *The Annals of*  
848 *Statistics*, 29(5), 1189–1232. <https://doi.org/10.1214/aos/1013203451>
- 849 Friston, K. J. (2011, June 1). *Functional and Effective Connectivity: A Review* (140 Huguenot Street,  
850 3rd Floor New Rochelle, NY 10801 USA) [Research-article]. <https://Home.Liebertpub.Com/Brain;>  
851 Mary Ann Liebert, Inc. 140 Huguenot Street, 3rd Floor New Rochelle, NY 10801 USA.  
852 <https://doi.org/10.1089/brain.2011.0008>
- 853 Friston, K. J., Kahan, J., Biswal, B., & Razi, A. (2014). A DCM for resting state fMRI. *NeuroImage*, 94,  
854 396–407. <https://doi.org/10.1016/j.neuroimage.2013.12.009>
- 855 GBD 2019 Mental Disorders Collaborators. (2022). Global, regional, and national burden of 12  
856 mental disorders in 204 countries and territories, 1990–2019: A systematic analysis for the Global  
857 Burden of Disease Study 2019. *The Lancet Psychiatry*, 9(2), 137–150. [https://doi.org/10.1016/S2215-0366\(21\)00395-3](https://doi.org/10.1016/S2215-0366(21)00395-3)
- 859 Glasser, M. F., Coalson, T. S., Robinson, E. C., Hacker, C. D., Harwell, J., Yacoub, E., Ugurbil, K.,  
860 Andersson, J., Beckmann, C. F., Jenkinson, M., Smith, S. M., & Van Essen, D. C. (2016). A multi-modal  
861 parcellation of human cerebral cortex. *Nature*, 536(7615), Article 7615.  
862 <https://doi.org/10.1038/nature18933>
- 863 Gordon, J. A. (2016). On being a circuit psychiatrist. *Nature Neuroscience*, 19(11), Article 11.  
864 <https://doi.org/10.1038/nn.4419>
- 865 Goulden, N., Khusnulina, A., Davis, N. J., Bracewell, R. M., Bokde, A. L., McNulty, J. P., & Mullins, P. G.  
866 (2014). The salience network is responsible for switching between the default mode network and  
867 the central executive network: Replication from DCM. *NeuroImage*, 99, 180–190.  
868 <https://doi.org/10.1016/j.neuroimage.2014.05.052>
- 869 Gratton, C., Sun, H., & Petersen, S. E. (2018). Control networks and hubs. *Psychophysiology*, 55(3).  
870 <https://doi.org/10.1111/psyp.13032>
- 871 Gu, S.-C., Zhou, J., Yuan, C.-X., & Ye, Q. (2020). Personalized prediction of depression in patients with  
872 newly diagnosed Parkinson’s disease: A prospective cohort study. *Journal of Affective Disorders*, 268,  
873 118–126. <https://doi.org/10.1016/j.jad.2020.02.046>

- 874 Harris, J. K., Hassel, S., Davis, A. D., Zamyadi, M., Arnott, S. R., Milev, R., Lam, R. W., Frey, B. N., Hall,  
875 G. B., Müller, D. J., Rotzinger, S., Kennedy, S. H., Strother, S. C., MacQueen, G. M., & Greiner, R.  
876 (2022). Predicting escitalopram treatment response from pre-treatment and early response resting  
877 state fMRI in a multi-site sample: A CAN-BIND-1 report. *NeuroImage: Clinical*, *35*, 103120.  
878 <https://doi.org/10.1016/j.nicl.2022.103120>
- 879 He, T., Kong, R., Holmes, A. J., Nguyen, M., Sabuncu, M. R., Eickhoff, S. B., Bzdok, D., Feng, J., & Yeo,  
880 B. T. T. (2020). Deep neural networks and kernel regression achieve comparable accuracies for  
881 functional connectivity prediction of behavior and demographics. *NeuroImage*, *206*, 116276.  
882 <https://doi.org/10.1016/j.neuroimage.2019.116276>
- 883 Hirshfeld-Becker, D. R., Gabrieli, J. D. E., Shapero, B. G., Biederman, J., Whitfield-Gabrieli, S., & Chai,  
884 X. J. (2019). Intrinsic Functional Brain Connectivity Predicts Onset of Major Depression Disorder in  
885 Adolescence: A Pilot Study. *Brain Connectivity*, *9*(5), 388–398.  
886 <https://doi.org/10.1089/brain.2018.0646>
- 887 Hopman, H. J., Chan, S. M. S., Chu, W. C. W., Lu, H., Tse, C.-Y., Chau, S. W. H., Lam, L. C. W., Mak, A.  
888 D. P., & Neggers, S. F. W. (2021). Personalized prediction of transcranial magnetic stimulation clinical  
889 response in patients with treatment-refractory depression using neuroimaging biomarkers and  
890 machine learning. *Journal of Affective Disorders*, *290*, 261–271.  
891 <https://doi.org/10.1016/j.jad.2021.04.081>
- 892 Howard, D. M., Folkersen, L., Coleman, J. R. I., Adams, M. J., Glanville, K., Werge, T., Hagenaars, S. P.,  
893 Han, B., Porteous, D., Campbell, A., Clarke, T.-K., Breen, G., Sullivan, P. F., Wray, N. R., Lewis, C. M., &  
894 McIntosh, A. M. (2020). Genetic stratification of depression in UK Biobank. *Translational Psychiatry*,  
895 *10*(1), Article 1. <https://doi.org/10.1038/s41398-020-0848-0>
- 896 Hyett, M. P., Parker, G. B., Guo, C. C., Zalesky, A., Nguyen, V. T., Yuen, T., & Breakspear, M. (2015).  
897 Scene unseen: Disrupted neuronal adaptation in melancholia during emotional film viewing.  
898 *NeuroImage: Clinical*, *9*, 660–667. <https://doi.org/10.1016/j.nicl.2015.10.011>
- 899 Jenkinson, M., Beckmann, C. F., Behrens, T. E. J., Woolrich, M. W., & Smith, S. M. (2012). FSL.  
900 *NeuroImage*, *62*(2), 782–790. <https://doi.org/10.1016/j.neuroimage.2011.09.015>
- 901 Ju, Y., Horien, C., Chen, W., Guo, W., Lu, X., Sun, J., Dong, Q., Liu, B., Liu, J., Yan, D., Wang, M., Zhang,  
902 L., Guo, H., Zhao, F., Zhang, Y., Shen, X., Constable, R. T., & Li, L. (2020). Connectome-based models  
903 can predict early symptom improvement in major depressive disorder. *Journal of Affective Disorders*,  
904 *273*, 442–452. <https://doi.org/10.1016/j.jad.2020.04.028>
- 905 Kaiser, R. H., Andrews-Hanna, J. R., Wager, T. D., & Pizzagalli, D. A. (2015). Large-Scale Network  
906 Dysfunction in Major Depressive Disorder: A Meta-analysis of Resting-State Functional Connectivity.  
907 *JAMA Psychiatry*, *72*(6), 603–611. <https://doi.org/10.1001/jamapsychiatry.2015.0071>
- 908 King, M., Walker, C., Levy, G., Bottomley, C., Royston, P., Weich, S., Bellón-Saameño, J. Á., Moreno,  
909 B., Švab, I., Rotar, D., Rifel, J., Maarros, H.-I., Aluoja, A., Kalda, R., Neeleman, J., Geerlings, M. I.,  
910 Xavier, M., Carraça, I., Gonçalves-Pereira, M., ... Nazareth, I. (2008). Development and Validation of  
911 an International Risk Prediction Algorithm for Episodes of Major Depression in General Practice  
912 Attendees: The PredictD Study. *Archives of General Psychiatry*, *65*(12), 1368–1376.  
913 <https://doi.org/10.1001/archpsyc.65.12.1368>

- 914 Kupferberg, A., Bicks, L., & Hasler, G. (2016). Social functioning in major depressive disorder.  
915 *Neuroscience & Biobehavioral Reviews*, *69*, 313–332.  
916 <https://doi.org/10.1016/j.neubiorev.2016.07.002>
- 917 Lawrence, A. J., Stahl, D., Duan, S., Fennema, D., Jaeckle, T., Young, A. H., Dazzan, P., Moll, J., & Zahn,  
918 R. (2022). Neurocognitive Measures of Self-blame and Risk Prediction Models of Recurrence in Major  
919 Depressive Disorder. *Biological Psychiatry: Cognitive Neuroscience and Neuroimaging*, *7*(3), 256–264.  
920 <https://doi.org/10.1016/j.bpsc.2021.06.010>
- 921 Li, B., Daunizeau, J., Stephan, K. E., Penny, W., Hu, D., & Friston, K. (2011). Generalised filtering and  
922 stochastic DCM for fMRI. *NeuroImage*, *58*(2), 442–457.  
923 <https://doi.org/10.1016/j.neuroimage.2011.01.085>
- 924 Librenza-Garcia, D., Passos, I. C., Feiten, J. G., Lotufo, P. A., Goulart, A. C., Santos, I. de S., Viana, M.  
925 C., Benseñor, I. M., & Brunoni, A. R. (2021). Prediction of depression cases, incidence, and chronicity  
926 in a large occupational cohort using machine learning techniques: An analysis of the ELSA-Brasil  
927 study. *Psychological Medicine*, *51*(16), 2895–2903. <https://doi.org/10.1017/S0033291720001579>
- 928 Lin, S., Wu, Y., He, L., & Fang, Y. (2022). Prediction of depressive symptoms onset and long-term  
929 trajectories in home-based older adults using machine learning techniques. *Aging & Mental Health*,  
930 *0*(0), 1–10. <https://doi.org/10.1080/13607863.2022.2031868>
- 931 Lundberg, S. M., & Lee, S.-I. (2017). A Unified Approach to Interpreting Model Predictions. In I.  
932 Guyon, U. V. Luxburg, S. Bengio, H. Wallach, R. Fergus, S. Vishwanathan, & R. Garnett (Eds.),  
933 *Advances in Neural Information Processing Systems* (Vol. 30). Curran Associates, Inc.  
934 <https://proceedings.neurips.cc/paper/2017/file/8a20a8621978632d76c43dfd28b67767-Paper.pdf>
- 935 Merikangas, K. R., Wicki, W., & Angst, J. (1994). Heterogeneity of Depression: Classification of  
936 Depressive Subtypes by Longitudinal Course. *The British Journal of Psychiatry*, *164*(3), 342–348.  
937 <https://doi.org/10.1192/bjp.164.3.342>
- 938 Miller, K. L., Alfaro-Almagro, F., Bangerter, N. K., Thomas, D. L., Yacoub, E., Xu, J., Bartsch, A. J.,  
939 Jbabdi, S., Sotiropoulos, S. N., Andersson, J. L. R., Griffanti, L., Douaud, G., Okell, T. W., Weale, P.,  
940 Dragonu, I., Garratt, S., Hudson, S., Collins, R., Jenkinson, M., ... Smith, S. M. (2016). Multimodal  
941 population brain imaging in the UK Biobank prospective epidemiological study. *Nature Neuroscience*,  
942 *19*(11), Article 11. <https://doi.org/10.1038/nn.4393>
- 943 Motlaghian, S. M., Belger, A., Bustillo, J. R., Ford, J. M., Iraj, A., Lim, K., Mathalon, D. H., Mueller, B.  
944 A., O’Leary, D., Pearlson, G., Potkin, S. G., Preda, A., van Erp, T. G. M., & Calhoun, V. D. (2022).  
945 Nonlinear functional network connectivity in resting functional magnetic resonance imaging data.  
946 *Human Brain Mapping*, *43*(15), 4556–4566. <https://doi.org/10.1002/hbm.25972>
- 947 Na, K.-S., Cho, S.-E., Geem, Z. W., & Kim, Y.-K. (2020). Predicting future onset of depression among  
948 community dwelling adults in the Republic of Korea using a machine learning algorithm.  
949 *Neuroscience Letters*, *721*, 134804. <https://doi.org/10.1016/j.neulet.2020.134804>
- 950 Nair, V., & Hinton, G. E. (2010). Rectified linear units improve restricted boltzmann machines.  
951 *Proceedings of the 27th International Conference on International Conference on Machine Learning*,  
952 807–814.
- 953 Nickerson, L. D., Smith, S. M., Öngür, D., & Beckmann, C. F. (2017). Using Dual Regression to  
954 Investigate Network Shape and Amplitude in Functional Connectivity Analyses. *Frontiers in*  
955 *Neuroscience*, *11*. <https://www.frontiersin.org/articles/10.3389/fnins.2017.00115>

- 956 Noble, S., Scheinost, D., & Constable, R. T. (2019). A decade of test-retest reliability of functional  
957 connectivity: A systematic review and meta-analysis. *NeuroImage*, *203*, 116157.  
958 <https://doi.org/10.1016/j.neuroimage.2019.116157>
- 959 Osuch, E., Gao, S., Wammes, M., Théberge, J., Williamson, P., Neufeld, R. J., Du, Y., Sui, J., & Calhoun,  
960 V. (2018). Complexity in mood disorder diagnosis: fMRI connectivity networks predicted medication-  
961 class of response in complex patients. *Acta Psychiatrica Scandinavica*, *138*(5), 472–482.  
962 <https://doi.org/10.1111/acps.12945>
- 963 Pagliaccio, D., Luby, J. L., Luking, K. R., Belden, A. C., & Barch, D. M. (2014). Brain–behavior  
964 relationships in the experience and regulation of negative emotion in healthy children: Implications  
965 for risk for childhood depression. *Development and Psychopathology*, *26*(4pt2), 1289–1303.  
966 <https://doi.org/10.1017/S0954579414001035>
- 967 Pappmeyer, M., Sussmann, J. E., Stewart, T., Giles, S., Centola, J. G., Zannias, V., Lawrie, S. M.,  
968 Whalley, H. C., & McIntosh, A. M. (2016). Prospective longitudinal study of subcortical brain volumes  
969 in individuals at high familial risk of mood disorders with or without subsequent onset of depression.  
970 *Psychiatry Research: Neuroimaging*, *248*, 119–125.  
971 <https://doi.org/10.1016/j.psychres.2015.12.009>
- 972 Platt, J. C. (1999). Probabilistic Outputs for Support Vector Machines and Comparisons to  
973 Regularized Likelihood Methods. *Advances in Large Margin Classifiers*, 61–74.
- 974 Poldrack, R. A., Huckins, G., & Varoquaux, G. (2020). Establishment of Best Practices for Evidence for  
975 Prediction: A Review. *JAMA Psychiatry*, *77*(5), 534–540.  
976 <https://doi.org/10.1001/jamapsychiatry.2019.3671>
- 977 Queirazza, F., Fouragnan, E., Steele, J. D., Cavanagh, J., & Philiastrides, M. G. (2019). Neural correlates  
978 of weighted reward prediction error during reinforcement learning classify response to cognitive  
979 behavioral therapy in depression. *Science Advances*, *5*(7), eaav4962.  
980 <https://doi.org/10.1126/sciadv.aav4962>
- 981 Raposo Pereira, F., Zhutovsky, P., McMaster, M. T. B., Polderman, N., de Vries, Y. D. A. T., van den  
982 Brink, W., & van Wingen, G. A. (2019). Recreational use of GHB is associated with alterations of  
983 resting state functional connectivity of the central executive and default mode networks. *Human*  
984 *Brain Mapping*, *40*(8), 2413–2421. <https://doi.org/10.1002/hbm.24532>
- 985 Rocha, T. B.-M., Fisher, H. L., Caye, A., Anselmi, L., Arseneault, L., Barros, F. C., Caspi, A., Danese, A.,  
986 Gonçalves, H., Harrington, H. L., Houts, R., Menezes, A. M. B., Moffitt, T. E., Mondelli, V., Poulton, R.,  
987 Rohde, L. A., Wehrmeister, F., & Kieling, C. (2021). Identifying Adolescents at Risk for Depression: A  
988 Prediction Score Performance in Cohorts Based in 3 Different Continents. *Journal of the American*  
989 *Academy of Child & Adolescent Psychiatry*, *60*(2), 262–273.  
990 <https://doi.org/10.1016/j.jaac.2019.12.004>
- 991 Rosellini, A. J., Liu, S., Anderson, G. N., Sbi, S., Tung, E. S., & Knyazhanskaya, E. (2020). Developing  
992 algorithms to predict adult onset internalizing disorders: An ensemble learning approach. *Journal of*  
993 *Psychiatric Research*, *121*, 189–196. <https://doi.org/10.1016/j.jpsychires.2019.12.006>
- 994 Rush, A. J., Trivedi, M. H., Wisniewski, S. R., Nierenberg, A. A., Stewart, J. W., Warden, D., Niederehe,  
995 G., Thase, M. E., Lavori, P. W., Lebowitz, B. D., McGrath, P. J., Rosenbaum, J. F., Sackeim, H. A.,  
996 Kupfer, D. J., Luther, J., & Fava, M. (2006). Acute and Longer-Term Outcomes in Depressed

- 997 Outpatients Requiring One or Several Treatment Steps: A STAR\*D Report. *American Journal of*  
998 *Psychiatry*, 163(11), 1905–1917. <https://doi.org/10.1176/ajp.2006.163.11.1905>
- 999 Sampson, L., Jiang, T., Gradus, J. L., Cabral, H. J., Rosellini, A. J., Calabrese, J. R., Cohen, G. H., Fink, D.  
1000 S., King, A. P., Liberzon, I., & Galea, S. (2021). A Machine Learning Approach to Predicting New-onset  
1001 Depression in a Military Population. *Psychiatric Research and Clinical Practice*, 3(3), 115–122.  
1002 <https://doi.org/10.1176/appi.prcp.20200031>
- 1003 Schmaal, L., Marquand, A. F., Rhebergen, D., van Tol, M.-J., Ruhé, H. G., van der Wee, N. J. A.,  
1004 Veltman, D. J., & Penninx, B. W. J. H. (2015). Predicting the Naturalistic Course of Major Depressive  
1005 Disorder Using Clinical and Multimodal Neuroimaging Information: A Multivariate Pattern  
1006 Recognition Study. *Biological Psychiatry*, 78(4), 278–286.  
1007 <https://doi.org/10.1016/j.biopsych.2014.11.018>
- 1008 Schöbi, D., Homberg, F., Frässle, S., Endepols, H., Moran, R. J., Friston, K. J., Tittgemeyer, M., Heinzle,  
1009 J., & Stephan, K. E. (2021). Model-based prediction of muscarinic receptor function from auditory  
1010 mismatch negativity responses. *NeuroImage*, 237, 118096.  
1011 <https://doi.org/10.1016/j.neuroimage.2021.118096>
- 1012 Schulz, M.-A., Yeo, B. T. T., Vogelstein, J. T., Mourao-Miranada, J., Kather, J. N., Kording, K., Richards,  
1013 B., & Bzdok, D. (2020). Different scaling of linear models and deep learning in UKBiobank brain  
1014 images versus machine-learning datasets. *Nature Communications*, 11(1), Article 1.  
1015 <https://doi.org/10.1038/s41467-020-18037-z>
- 1016 Shapero, B. G., Chai, X. J., Vangel, M., Biederman, J., Hoover, C. S., Whitfield-Gabrieli, S., Gabrieli, J.  
1017 D. E., & Hirshfeld-Becker, D. R. (2019). Neural markers of depression risk predict the onset of  
1018 depression. *Psychiatry Research: Neuroimaging*, 285, 31–39.  
1019 <https://doi.org/10.1016/j.pscychresns.2019.01.006>
- 1020 Shapley, L. S. (1953). 17. A Value for n-Person Games. In 17. *A Value for n-Person Games* (pp. 307–  
1021 318). Princeton University Press. <https://doi.org/10.1515/9781400881970-018>
- 1022 Shen, X., Cox, S. R., Adams, M. J., Howard, D. M., Lawrie, S. M., Ritchie, S. J., Bastin, M. E., Deary, I. J.,  
1023 McIntosh, A. M., & Whalley, H. C. (2018). Resting-State Connectivity and Its Association With  
1024 Cognitive Performance, Educational Attainment, and Household Income in the UK Biobank.  
1025 *Biological Psychiatry: Cognitive Neuroscience and Neuroimaging*, 3(10), 878–886.  
1026 <https://doi.org/10.1016/j.bpsc.2018.06.007>
- 1027 Smith, S. M., Fox, P. T., Miller, K. L., Glahn, D. C., Fox, P. M., Mackay, C. E., Filippini, N., Watkins, K. E.,  
1028 Toro, R., Laird, A. R., & Beckmann, C. F. (2009). Correspondence of the brain's functional architecture  
1029 during activation and rest. *Proceedings of the National Academy of Sciences*, 106(31), 13040–13045.  
1030 <https://doi.org/10.1073/pnas.0905267106>
- 1031 Steffen, A., Nübel, J., Jacobi, F., Bätzing, J., & Holstiege, J. (2020). Mental and somatic comorbidity of  
1032 depression: A comprehensive cross-sectional analysis of 202 diagnosis groups using German  
1033 nationwide ambulatory claims data. *BMC Psychiatry*, 20(1), 142. <https://doi.org/10.1186/s12888-020-02546-8>
- 1035 Stephan, K. E., Iglesias, S., Heinzle, J., & Diaconescu, A. O. (2015). Translational Perspectives for  
1036 Computational Neuroimaging. *Neuron*, 87(4), 716–732.  
1037 <https://doi.org/10.1016/j.neuron.2015.07.008>

- 1038 Stephan, K. E., Schlagenhaut, F., Huys, Q. J. M., Raman, S., Aponte, E. A., Brodersen, K. H., Rigoux, L.,  
1039 Moran, R. J., Daunizeau, J., Dolan, R. J., Friston, K. J., & Heinz, A. (2017). Computational  
1040 neuroimaging strategies for single patient predictions. *NeuroImage*, *145*, 180–199.  
1041 <https://doi.org/10.1016/j.neuroimage.2016.06.038>
- 1042 Stone, M. (1974). Cross-Validatory Choice and Assessment of Statistical Predictions. *Journal of the*  
1043 *Royal Statistical Society. Series B (Methodological)*, *36*(2), 111–147.
- 1044 van Eeden, W. A., Luo, C., van Hemert, A. M., Carlier, I. V. E., Penninx, B. W., Wardenaar, K. J., Hoos,  
1045 H., & Giltay, E. J. (2021). Predicting the 9-year course of mood and anxiety disorders with automated  
1046 machine learning: A comparison between auto-sklearn, naïve Bayes classifier, and traditional logistic  
1047 regression. *Psychiatry Research*, *299*, 113823. <https://doi.org/10.1016/j.psychres.2021.113823>
- 1048 van Wijk, B. C. M., Cagnan, H., Litvak, V., Kühn, A. A., & Friston, K. J. (2018). Generic dynamic causal  
1049 modelling: An illustrative application to Parkinson’s disease. *NeuroImage*, *181*, 818–830.  
1050 <https://doi.org/10.1016/j.neuroimage.2018.08.039>
- 1051 Varoquaux, G. (2018). Cross-validation failure: Small sample sizes lead to large error bars.  
1052 *NeuroImage*, *180*, 68–77. <https://doi.org/10.1016/j.neuroimage.2017.06.061>
- 1053 Voorhees, B. W. V., Paunesku, D., Gollan, J., Kuwabara, S., Reinecke, M., & Basu, A. (2008). Predicting  
1054 Future Risk of Depressive Episode in Adolescents: The Chicago Adolescent Depression Risk  
1055 Assessment (CADRA). *The Annals of Family Medicine*, *6*(6), 503–511.  
1056 <https://doi.org/10.1370/afm.887>
- 1057 Vos, T., Lim, S. S., Abbafati, C., Abbas, K. M., Abbasi, M., Abbasifard, M., Abbasi-Kangevari, M.,  
1058 Abbastabar, H., Abd-Allah, F., Abdelalim, A., Abdollahi, M., Abdollahpour, I., Abolhassani, H.,  
1059 Aboyans, V., Abrams, E. M., Abreu, L. G., Abrigo, M. R. M., Abu-Raddad, L. J., Abushouk, A. I., ...  
1060 Murray, C. J. L. (2020). Global burden of 369 diseases and injuries in 204 countries and territories,  
1061 1990–2019: A systematic analysis for the Global Burden of Disease Study 2019. *The Lancet*,  
1062 *396*(10258), 1204–1222. [https://doi.org/10.1016/S0140-6736\(20\)30925-9](https://doi.org/10.1016/S0140-6736(20)30925-9)
- 1063 Wray, N. R., Ripke, S., Mattheisen, M., Trzaskowski, M., Byrne, E. M., Abdellaoui, A., Adams, M. J.,  
1064 Agerbo, E., Air, T. M., Andlauer, T. M. F., Bacanu, S.-A., Bækvad-Hansen, M., Beekman, A. F. T.,  
1065 Bigdeli, T. B., Binder, E. B., Blackwood, D. R. H., Bryois, J., Buttenschøn, H. N., Bybjerg-Grauholm, J., ...  
1066 Sullivan, P. F. (2018). Genome-wide association analyses identify 44 risk variants and refine the  
1067 genetic architecture of major depression. *Nature Genetics*, *50*(5), Article 5.  
1068 <https://doi.org/10.1038/s41588-018-0090-3>
- 1069 Xia, Y., Chen, Q., Shi, L., Li, M., Gong, W., Chen, H., & Qiu, J. (2018). Tracking the dynamic functional  
1070 connectivity structure of the human brain across the adult lifespan. *Human Brain Mapping*, *40*(3),  
1071 717–728. <https://doi.org/10.1002/hbm.24385>
- 1072 Xu, Z., Zhang, Q., Li, W., Li, M., & Yip, P. S. F. (2019). Individualized prediction of depressive disorder  
1073 in the elderly: A multitask deep learning approach. *International Journal of Medical Informatics*, *132*,  
1074 103973. <https://doi.org/10.1016/j.ijmedinf.2019.103973>
- 1075 Zhang, H. (2004). *The Optimality of Naive Bayes*. 2.
- 1076
